# Supplementary material for: Downregulated m⁵C Regulator NSUN6 Enhances Proliferation, Migration and affects immune regulation in Ovarian Cancer
Source: Research Square preprint supplement (doi:10.21203/rs.3.rs-7313758/v1), 2025-12-08
Supplement: Supplementary file 1 [file 7dc2300e4cef987702960f17.xlsx]

## Sheet: GSE14407+upregulation
GSE14407
LOC101928554
CENPF
SPON1
LOC100509445///LOC728715///OVOS///OVOS2
DTL
MUC1
BUB1B
CDCA3
MCM10
LOC100129098
ZWINT
PTTG3P
ZIC1
SPON1
IQGAP3
S100A1
LRP8
NUSAP1
SLC4A11
KLK7
APOLD1
ESPL1
SOX17
KIF20A
VEGFA
SLC2A1
NEK2
RRM2
SPON1
ESPL1
PRAME
KIF18B
DEPDC1
TPX2
BIRC5
CDT1
KIF4A
KIF2C
NCAPG
AURKA
ORC6
MKI67
C12orf56
RAD51
SFN
TFAP2A
BOLA2B///BOLA2
UBE2C
BUB1
POC1A
ERFE
CCNB2
CKS2
CCNE1
AIF1L
GLDC
LOC102724312
CXXC5
GGCX
PRR11
KLK8
PAX8
KIAA1217
CENPU
NR2F6
CXXC5
S100A13
HMGA1
BSPRY
FZD2
ERCC6L
SORT1
SNTB1
NCAPH
MECOM
WFDC2
SFN
DTL
EME1
SPAG11A///SPAG11B
KIAA1217
CBX2
MICALL2
C1orf106
DTYMK
CP
FAM69B
TTK
CELSR3
RMI2
NFATC2IP
PLEKHG2
PCDH19
MIR24-2///MIR23A///LOC284454
PSAT1
BBOX1-AS1
MCM4
LZTS3
MTFR2
LZTS1
MREG
SCRIB
UHRF1
CDC25A
SPAG5
GLI4
PRC1
FAM83D
NUF2
SULT1C2
CD24
BLM
NOX4
SLC26A7
LOC101929219///C1orf186
GINS4
DNMT3B
SOX17
FAM64A
XKR4
MYO10
TIMELESS
ADA
CXXC5
LOC101927929
STON2
RACGAP1
ASS1
PABPC1L
GGCX
PAX8
PTTG1
CP
ARAP3
CCNB1
MIR6840///STAG3L5P-PVRIG2P-PILRB///PILRB
ZBTB42
GDF11
PTPRG
WNT7A
EMC3-AS1
CENPF
CDH6
CD24
PIF1
CDC25C
LHX6
EZH2
MTHFD2
ANGPT2
GNGT1
GUCY1A3
GJC1
TOP2A
KLHL14
VEGFA
BCL11A
SYT13
AURKA
RALGAPB
LOC105379499///FLJ45482
CSPG5
GINS2
ICA1
CENPU
NEIL3
OIP5
PSRC1
SORD
CDYL
FANCD2
PRIMA1
MELK
CCNA2
TMEM38A
PTX3
SEMA3F
MAL
TMEFF2
MECOM
L1CAM
ADGRG1
SLC52A2
LOC100507353///CACNA1A
MCM2
CDC20
ESRP1
SEC61A1
RRM2
GAS2L3
MKI67
KNOP1
LOC105369635
FAM171A1
RNPEPL1
POLQ
MCM10
HMMR
OVOL2
STIL
CDK1
ATAD2
VDR
OR7E37P
CHEK1
GINS1
LINC01296///DUXAP10
TSPAN12
ACVRL1
RAB39B
C9orf16
C5orf34
ATAD2
FANCA
FOXA3
KIAA0101
FOLR1
MIR21///VMP1
LARP6
MSX1
WHSC1
SLC35F6///CENPA
TPCN2
SYT11
DNMT3A
CDKN2A
MICALL2
LOC101060373///NOMO3///NOMO2///NOMO1
ADCY4
CRABP2
GLDN
SMAD6
FLT1
SPC24
COL4A1
EPB41L5
RELT
EXO1
CATIP-AS1
FANCI
GNAS
MPZL2
PBX2
JUP
DNPH1
GDF11
COL4A2
SFMBT1
CHTF18
PANK1
FGF18
ELOVL6
ADGRL4
AKAP8
PTH2R
LIMK1
CD24
CENPI
NR2C2AP
EPCAM
ULK1
KPNA2
KCNMB3
PDIA4
TROAP
THSD4
BIRC5
CD24
RNF183
CDCA5
KAZALD1
COL12A1
RC3H1
PAQR4
FANCI
KCNT1
CD93
TMEM44
FOXM1
ESM1
GPT2
SZT2
CTPS2
LINC01215
MIR6758///MARS
WFDC1
RAD51AP1
HOXB9
PSD4
SHANK3
SYNM
TMC6
INPPL1
SPC25
FILIP1
HDGF
DEPDC1
CDH6
CP
SLC34A2
TNPO1
CHEK1
MIR6845///NRBP2
LINC00523
LOC100130502
CDH6
PLAC1
ZNF710
DIRAS2
SORBS1
LAMC1
NOL4L
DYRK2
GSPT1
MIR612///NEAT1
ARPC5L
CDK1
TNF
DPP3
CD24
AP1S1
GPRC5B
ANGPT2
RNF157-AS1
RUSC1
NPM2
LOC101929219///LOC100505650///C1orf186
SAC3D1
CYYR1
KCNG1
NES
GCAT
LAMTOR5-AS1
MIR5193///UBA7
SLC44A2
PFKP
ZNF512B
MIR6756///MCAM
FMNL3
EPT1
ATXN7L1
CYYR1
DDX11
MNT
LGALS9
LOXL2
ELF3
DENND4B
VSIG10
ST6GALNAC1
MROH2A
SLC19A1
FDX1L
LIMS4///LIMS3
BZW2
GRHL2
LYPD1
PIK3C2B
PRORSD1P
NRP2
LOC81691
TNNI3
PRRG2
PLXND1
LOC101930655///C7orf73///SLC13A4
C14orf2
BLACAT1
MRPS18A
PACS2
NONO
LOC100507468
LEMD1
CX3CL1
STC2
CKAP2L
TOP2A
TMSB10
ECT2
NRTN
MSTO2P///MSTO1
OR7E12P
CCNE2
CMTM7
EFNA3
KLK6
CFL1
GPR158
ORAOV1
CDH6
FRYL
ZNF592
SHMT2
MRPL52
LOC105369739
RNFT2
LINC01297
FGF18
TAZ
MGAT4B
CTPS1
FJX1
TMTC1
PNMA3
ZC2HC1B
RASAL1
E2F7
LOC101927377
MYO3B
LOC648987
CD82
ZNF627
GPR19
ALPK3
CENPK
WDR55
MREG
MYO10
APLNR
GUCY1B3
COL4A1
PGGHG
VAMP1
KIF23
TK1
MROH1
KPNA1
RGL2
NUP210
ARMC2-AS1///ATP5J2
UQCRQ
ZNF503
NOTCH3
UCP2
LOC101930655///C7orf73
ABHD11
BIRC5
CDC6
FAM72A///FAM72D///FAM72B///FAM72C
C19orf60
LOC101928269///LOC100506403///RUNX1
SIRT6
GPR137C
CD47
DNAJC21
MAT2A
CXCL13
SLC1A3
FAM124A
FOXP4-AS1
ZFPL1
NR2C1
METTL26
TANK
LINC00884
CDC45
CDC7
SLC39A4
UBL7-AS1
MKI67
RIPPLY2
CTC-338M12.4
E2F2
BEND3
MCAM
LOC100289283
CDCA8
SPRYD4
HIST1H2AM
UNC5A
R3HDM1
LOC285812
TEAD4
LOC102725383
EBP
ARRDC3-AS1
PYM1
LPCAT4
FGFR2
LINGO1
LOC101928271
MAGEA10-MAGEA5///MAGEA5
CAMSAP1
PRR5-ARHGAP8///ARHGAP8
TMEM102
CCM2L
GPBP1L1
MEOX1
TMPO-AS1
MPZL2
MTRF1L
DVL2
VWA1
DNMT1
KCTD1
KIF18A
COX5B
FEN1
GRAMD2
SMIM11A
DBN1
XDH
PRR5-ARHGAP8///ARHGAP8
STON2
TBC1D20
RAB26
LINC01539
RAPGEF3
ALOX12P2
SCNN1A
HLA-DOB
DNA2
NTN5
FGD5
ARPC5L
SPOUT1
RDM1
AGFG2
HAPLN1
SST
GALNT2
UGGT1
SYT11
GFM2
SEC61A2
CLDN3
VCAN
CIAO1
IPO4
LIX1
PRSS2
SLC6A2
KCNN2
ACAD9
C6orf223
CYP27B1
HIST1H2BD
DLX6-AS1
HS6ST1
MMP11
RAB26
PEA15
PACSIN1
E2F1
PHLDA1
PROM2
HIST1H4H
OCA2
PAX8
PLXND1
LHX1
C3orf67
KNL1
MIR155///MIR155HG
ADAM5
ARHGEF39
LSM4
GJB3
TRAF4
ARPC5L
ARF6
RPARP-AS1
CEMIP
KRTAP4-1
SYK
LARGE2
LOC105378948
CBS
LOC105376796
PABPC1
OXLD1
PSD2
NXPH4
ENO3
FDPS
LYPD6
ZNF436-AS1
TMTC4
TCF3
KCTD1
HEY2
HRASLS2
SMIM22
HIST2H4B///HIST4H4///HIST2H4A///HIST1H4L///HIST1H4E///HIST1H4B///HIST1H4H///HIST1H4C///HIST1H4J///HIST1H4K///HIST1H4F///HIST1H4D///HIST1H4A///HIST1H4I
LOC150051
DEPDC1
NCDN
TRIP13
MAP4K1
RECQL4
LOC439938
CEP55
2022-09-08
MIR7112///BOP1
CASZ1
TIGD1
SEC24B-AS1
DSCC1
DPY30///MEMO1
RASSF10
NCBP2
APBA2
BRD4
CENPN
ADM5
PECAM1
SCARNA15
FOXN1
ECSCR
MEX3A
HOXD-AS2
LINC00665
CTHRC1
GUCY1A3
RNF144B
FOXH1
KHDRBS1
ERV3-2
SPON1
GPSM2
KIFC1
TUBD1
GSTP1
RCCD1
BCL11A
MIR21///VMP1
DDX11
PLXNA1
KLHL24
RNASEH2A
BARD1
ADRA2C
RGS16
LOC100129516
PNPLA2
DIP2A
AUNIP
LOXL2
SYTL1
KIAA1147
TMPO
CTBP1-AS2
NAV2
VCAN
RNF144B
EXOSC4
C12orf73
RABL6
ZEB1
CSRNP2
FLT1
MYO10
FRMD8
U2AF2
TSPAN12
PTPRC
CNPY2
SAMD1
MIR1306///DGCR8
SNORD77///SNORD76///SNORD74///GAS5///SNORD44///SNORD47///SNORD80///SNORD79///SNORD81
ELF3
CDKN2A
SRA1
LOC100507334///LOC100288570///LIMS3-LOC440895///LOC440895
HMMR
EHF
HIST2H2AA4///HIST2H2AA3
TRIM59
DEFB1
GALNT6
ZNF142
KCNQ3
KDM4C
KIF15
LOC285043
SMG5
CLRN1
TRPM1
KRT7
AP1S2
LOC100505710
GPM6B
FAM155B
CEP70
E2F1
KPNA4
ATP2A1-AS1
CENPN
AATK
MCM4
ASAP1
SRPK1
S100A6
SLC6A8
PPP1R14B
GAPDH
JAK3
RAB7A
TAF1C
SLC25A16
HK2
HMGXB3
THUMPD3-AS1
CALR
KIAA1217
GPRC5B
ARID4B///RBM34
LRRC32
IQSEC3
PITPNM2
SULT1C2
FOLR3
FLAD1
LRRC41
ASPM
GCDH
MAGEA1
DMWD
SMAD6
BORA
ASRGL1
INTS5
ALS2CR11
LINC01333
CACNA1D
CDKN3
OR9A1P
DGAT1
MXD3
ASMTL-AS1
TLCD1
INF2
FAM174B
LOC100288637///ARHGAP11B
TMPRSS4
FARSA
FBXL22
MIR1204///PVT1
EXO5
FMNL3
SUSD4
AMIGO3///GMPPB
SAPCD2
ATP5I
PPP1R3E
NAA38
ATG101
PRKCA
PPARD
LOC101060604///SLC7A5P2///SLC7A5P1
SMIM4
RASGEF1A
OSBPL3
KIAA1217
DUS1L
PDE11A
MFSD7
MATN4
CRB3
LOC401261
LRP8
CDC6
MAP2K6
STK38
SDCBP2-AS1
DTYMK
PLCE1-AS2
TAPBP
BCL11A
EMC1
ING4
KIF14
OGT
MEIS1
HIST2H2AA4///HIST2H2AA3
CHCHD10
ZNF578
LOC101928047
SFT2D2
TNRC6C-AS1
ANKS4B
TM9SF4
POLR2H
KIF11
KMT2D
BDH1
LOC101928274///VSIG10
PFKFB4
MED20
NPIPA1
GATAD2A
GAGE12D///GAGE12F///GAGE2A///GAGE12H///GAGE12E///GAGE12B///GAGE12C///GAGE12G///GAGE12I///GAGE7///GAGE6///GAGE5///GAGE4///GAGE2C
TMEM125
VPS8
SNORD77///SNORD76///SNORD74///GAS5///SNORD44///SNORD47///SNORD80///SNORD79///SNORD81
NAA38
MBD1
ZNF606
ZSCAN16
WDR72
KCTD1
RUSC1-AS1
TCF3
CAPN5
PYCR1
KIF14
CHAF1A
CP
FAM174B
LOC101930583///GOLGA8B///GOLGA8A
ASL
CORO1B
GJD3
JPH3
SRRT
XK
KIAA1524
DSN1
SCUBE3
EHF
LDB1
AHRR
OR7A5
MRGBP
DUSP2
MARVELD1
RCC1
RTFDC1
PPIL2
CCNY
ZNF789
ENG
CSPG4
ST6GALNAC2
HIGD1B
UHRF1BP1
BGN
FPGS
ZNF467
PSG1
EPHX4
LTB4R
LINC01558
MAPK12
PCDHB8
ESCO2
LOC374890
SEMA5B
LOC100287852///FAM136A
MFSD12
CADPS
GPR160
DHRS13
ZNF384
DNAJC13
LINC01296///DUXAP10///DUXAP8
LOC101928269///LOC100506403///RUNX1
CLMN
POLG
CD93
MIR6834///PFDN6
ADAR
POLH
VMA21
UBAP2L
MAP4K1
MYO19
HTATIP2
PSME4
ATE1
TSTA3
CCNB1
C21orf58
TMEM139
SNRPB
LOC100996345
MACC1
ZNF511
MARVELD3
F11
NSUN5
LINC01312
CSK
KAAG1
AJAP1
MYH14
SYT7
TBXA2R
LYNX1
MKI67
KIF1A
SLC27A3
OLFML2A
HKDC1
MTBP
SLC35C2
MAP4K1
RFX5
GMEB2
DDX3X
LAGE3
SNORA60///SNORA71E///SNHG11
CLUH
LINC01618
SKIL
LOC100506274
ACP6
MIR4454///ESRG
ATP5S
SIPA1L3
MAPKAPK2
LYPLA2
SOX13
TRNAU1AP
RAP1GAP2
HIST1H2BK
CRTAC1
MCL1
PRSS2///PRSS1
ZC3HAV1
H3F3A
ZNF710
TMEM147-AS1
NETO2
CCNB3
RPS19
ESPN
ARHGEF2
MCUR1
EIF1B-AS1
RAB15
INSL6
HSPBP1
HMGA2
COL9A1
ENDOU
KLHL25
SLC12A7
HIPK3
TNFRSF12A
FANCB
SLC23A3
SKA3
ITGB8
THY1
SKIL
NECAB3
C2CD3
USP35
GEN1
MIR142
LETM1
CASQ2
ACTR3
SSTR1
MATN1
COL9A2
ILDR1
RIMS3
RHBDF2
LOC100505942
INTS3
TMEM184B
RPL32P3
LEAP2
ROMO1
AQP6
FGFR1OP
TACC3
TIMM8B
NUP210P1
GAK
TRAK1
CABYR
LOC101927523
ME3
GTF2IRD1
GPSM2
NCAPG
MCM10
FLOT1
CDH6
LOC100507670
LRIG2
CNP
CCR7
C21orf62-AS1
PKD1L1
RAE1
ABCA2
MND1
ALDH1B1
SMC1A
FAM111A
TCIRG1
NACC1
CHPF2
ARFGAP1
TRIB2
DIRAS2
SNHG17///SNORA71B
ARF3
PHKG2
WWTR1
GPSM2
RIPPLY1
GET4///SUN1
CHMP4C
LYPD4
BOLA2
KDM5C
LOC286178
LHX4-AS1
IDH1-AS1
GOLGA2P5
WDR90
EXOC3
C2orf82
TMA7
DEFB126
ST8SIA2
ERVMER34-1
LOC100507336
ATAD5
CASKIN1
BCL11A
CABLES1
GZMB
HOXB7
PPM1H
MANEAL
IGFBP2
PPARD
TBC1D7
RAB27A
FOXK2
WFDC10B
IGFLR1
KLK7
TBX2
CASP2
EMID1
ELF3
CENPE
ITGB2-AS1
MMP7
GTSE1
C22orf42
LARP4B
TAS2R39
MMP1
ATP5I
PAK6
GSDMD
WDR43
COL22A1
TYRP1
CD24
ZNF391
TFE3
STON2
ANAPC7
C21orf2
FKBP4
MEIS1
FKSG49
SUSD2
NSUN5P2///NSUN5P1
C14orf2
SLC2A12
PTCSC1
S1PR3
ZNF618
HELB
BHLHA15
BORCS8
NCAM1
WHSC1
LOC100505782
SULT1C2
MRPL45P2
FANCD2
RPAP1
BHLHE41
MYO10
MIR4640///DDR1
VANGL1
USP28
C3orf80
LINC01410
LINC00674
TXNDC2
ST3GAL3
CGB7///NTF4
CBS
LOC100996506
PPP6R1
TP53I11
DPP9
ZNF552
SLC4A7
WSCD2
ANP32E
ARL6IP4
LOC102725263///LOC389906
TRMT1
GOLGA6A
LOC100509764///KRT86
LOC730101
MYH14
RAP1GAP
TPMT
BANCR
MIR6834///PFDN6
TMEM63A
LOC101930075///NPIPA8///NPIPA7///NPIPA5///NPIPA2///NPIPA3///PKD1P1///NPIPA1
LOC101928291
UNC5B
C18orf25
SHPK///TRPV1
PRSS3P2
VWF
SOX9
LOC284513
ESR1
TMEM169
SOGA1
CCSAP
UBALD1
ASAP1
NLRP1
LINC00454
CFL1
FILIP1
GNRHR
DHCR24
GOLGA6L2
CHST1
GRK6
ZNF783
NEB
ANGPT2
RAB1A
NEURL1B
ATG7
SUSD4
LGR6
TOP2A
RAD54L
SHROOM1
MBD6
OTUD7B
GPR39
GRIA1
KPTN
THADA
CCL28
SIX3
ZNF672
OVOL1
TRIM42
WDR72
NPM3
GGT7
PLEKHH1
SNHG17
HOMER2
LOC441666
DNAJC21
FAM111B
HIST1H1C
SPSB1
MIR424///MIR503HG
ESRP1
KAZN
LOC100129503
TTC39A
PLPP4
GUCY1B3
IRAK1
ATP6V0B
BCAN
HIST1H2BH
MCM3AP-AS1
SDHC
CLEC18A///CLEC18C
PLEKHA5
LINC01089
FANCE
HIST1H3F///HIST1H3B///HIST1H3H///HIST1H3J///HIST1H3G///HIST1H3I///HIST1H3E///HIST1H3C///HIST1H3D///HIST1H3A///HIST1H2AD
CYP1A2
DIAPH3
HIST1H2BD
EGFL6
MYO6
CAPN12
SCAMP2
GGCX
ITPR3
GFAP
DGKK
BCL2L14
C11orf71
SRRT
TM4SF18
IBSP
LINC01138
FUT8-AS1
C9orf16
RAPGEF5
RHBDD3
TBX1
CXCL16
CDCA2
LTB4R
GATAD2A
BACE2
HEYL
MIR612///NEAT1
LOC101929219///LOC100505650///C1orf186
POTEM
NIPSNAP1
F2RL1
MYLPF
LOC105373150
CT55
UQCRHL///UQCRH
LIPG
SMARCA4
EIF4E
PABPC1L
NRSN1
LOC100505938
RPF1
NKD2
ZNF142
MCM6
TCAIM
OR51B2
GART
LNPEP
LOC79160
ST14
AGBL5
LINC00636
DPM3
SRD5A1
LOC102724993///LOC101930075///NPIPA8///NPIPA7///NPIPA5///NPIPA2///NPIPA3///PKD1P1///NPIPA1
MUC16
RAD54L2
HOXB7
C17orf80
ARL17B///ARL17A
BCL6B
CASC7///AGO2
CHD7
FBXO46
TSPAN15
AKT2
TRIO
DOPEY2
NRN1
NCOA5
KIR3DL3
LOC101929988
MIR7703///PSME2
PACSIN3
STOML1
CPSF4
FBXL17
NUP210
RNF40
KIAA0040
FLOT1
CDK1
BGN
HIGD2A
NR2E3
MIR612///NEAT1
JPH1
SLC13A5
RPRD2
LINC00563
UQCC3
TBC1D5
MYO10
ZFHX3
ARF6
PEA15
RAD18
LOC105369705
C15orf39
IKZF1
CCDC130
MIR24-2///MIR23A///LOC284454
CABLES1
AMN
BLOC1S1-RDH5///RDH5
KCNK12
WDR12
BTNL9
AGFG1
SOX12
COL13A1
RBCK1
RXRB
LLGL1
NOLC1
DAG1
LINC00598
GFOD1
MCM8
PRKCI
CKS1B
HAUS5
C22orf34
CELF1
PDE9A
PAX8
VEGFA
RABL3
HELZ2
VMA21
AURKB
GPSM2
HRH4
LOC100505658
SOX13
ACSM2A
MRVI1
ZGRF1
BIK
MCF2L
BDH1
DTX3L
GUCA1A
KCNV1
ZNF827
LOC284661
GPM6B
SLC39A14
STRA13
TJAP1
NUCKS1
CNPY3
KIAA1161
NUB1
FAM224A///FAM224B
OTULIN
CCDC36
CXCR4
FANCG
ATP2A3
DDRGK1
TAF15
MAP4
FBXL18
LOC101927131
GTSE1
SFMBT1
MRPL12
WISP3
S100A2
DLGAP4
LOC105375839
ST18
UNC13A
EWSAT1
FZD10
PBX2
LINC00173
UNC79
TYMP
ASTN2
PAX6
NSUN5P1
IZUMO4
LNPEP
SFRP5
C8orf82
LOC105373764
EML4
LOC101929662
NSFL1C
UBE2O
PRR19
ELOVL5
SNN
POC1A
RHD
YME1L1
ZHX1-C8orf76
HADHAP1
FGF8
ARAP1
SLC38A10
SYNGR2
SNX25
MKRN2
USP28
PCDH7
CTRB2///CTRB1
NKX3-2
PIWIL1
POMGNT1
PARP10
TFAP2B
SCD
MMACHC
ATF5
AMIGO3///GMPPB
WDR4
COX8C
MCM4
BPHL
LCN2
COX5B
JMJD1C-AS1
IQCF5-AS1
CCDC150
FAM160A1
TUBA4A
TYMS
LOC101928841
CDCA3
TSR2
LINC01271
HIST1H1A
SOX9
MAGEA11
ZNF783
TPI1
WDR91
SYCN
SFTPC
PXMP4
MRRF
MFSD7
TMEM61
LOC100506472
NOCT
TPI1
KIF2C
MTF2
FLVCR2
EHD3
TMTC1
SBK1
COX6A1
RGS1
ZNF257
LOC100996740
SGO1
PBK
BTBD11
PRKCH
MAGEA4
CYHR1
LOC100506175
TRA2A
RGS19
LOC285902///ZNF273
CHRNA3
FAM107A
ZFAT
STC2
LOC285902///ZNF479///ZNF273
LOC101060391
TRIM8
SOCS3
TSACC
LCN12
ILF3
G3BP1
ZFP69B
DNM3OS
LOC101929036///PAH
ELMOD2
TBX19
TSEN54
UBE2QL1
LINC00470
ESAM
LEXM
LTBR
PA2G4
LOC440792
CHPF2
GALK1
HIPK1
LOC149351
CORIN
CYP26B1
HMGA2
DIS3L2
COL1A1
MYEF2
KSR2
RNF212
PMS2P3
LINC01260
DEPDC1B
LOC100507634
SNORA3A///RPL27A
SLIT1-AS1
TIMM23B///TIMM23
ATOX1
LOC101929007
TERB2
FER1L4
CXCL14
NRXN1
L3MBTL1
SNORA16A///SNORA61///SNORA44///SNHG12
TCF3
SMC4
METTL7B
FLJ46875
ASH1L-AS1
TMEM53
RABEP2
HLA-DOA
DNPEP
USP26
RCC2
GPATCH2L
CTSA
CAMTA1
CARD10
CARMN///MIR145
STX17-AS1
KCNA2
PKP1
LOC440982///ZIC1
UGT1A3///UGT1A1///UGT1A9///UGT1A5///UGT1A8
PTPRB
NAV1
DDAH1
FAM83H
LINC01405
HAP1
APC
WDR1
PKM
HDAC8
BID
RPL38
LRP8
TMTC1
RUNX3
JAG2
CA5BP1
LOC100506797
NDUFA10
PRSS22
SAP25///LRCH4
PPP4R1L
PHOX2A
EPHA1-AS1
KANSL1-AS1
LOC101927849
CBL
MSL3
NCAM1
GALNT8
ITGA7
LYG1
LINC00184
TEPSIN
CBX2
C16orf59
STON1
KMT2E-AS1
CAMTA1
SMCP
MYCT1
FAM47B
PQLC2L
ANO9
SSMEM1
LOC101928589///TMEM164
KDM7A
CLCN7
SSX4B///SSX4
LOC101928014
TRPC4
ATP10B
MTFP1
ENTPD1
LOC101928560
ALKBH6
RXFP1
FLAD1
HTR3A
C21orf2
SOX11
CPEB3
SLC2A1
HIST1H4E
LDLRAP1
OR1G1
CLDN6
NUAK1
APBA1
IL17C
TMEM161A
HDLBP
AFF3
ESRRA
ERVFH21-1
ELP6
SNPH
BICD1
SLC2A4RG
BCAM
PSMD2
MINA
HAPLN1
REG4
THY1
LOC100505609
TCF15
KIF20B
PAK1IP1
XPR1
DNAJC3-AS1
LYPLA2
RNF207
LOC101930416///LOC101929792///LOC100996724///PDE4DIP
LINC01503
DRD3
MAVS
CCDC57
ATF6B
SUGP1
OGFR
GLRX3
HTR1F
DAPL1
DDR1-AS1
FKSG49
MORC2
KPNB1
OR5K1
DNLZ///CARD9
SLC7A1
BCL10
SLC8A1
LSM14B
LOC780529
TNK2
PDE7A
ZNF843
INTS7
C11orf96
AUNIP
LINC00888
WDR34
ZNF578
SNX32
TNPO1
INSM1
CYP4F30P
SYNE4
FXR1
CYP19A1
LOC101559451
LARP4B
AJAP1
RAB3B
SPHK2
FAM110A
LOC728554///THOC3
CLDN19
EGLN2
C17orf96
HOXB8
LOC100287525
OLIG2
TNNT1
VANGL1
APOC1
DACH1
GUCY1A2
SNHG4///MATR3
CCNA2
TMCO6///IK
KCTD17
HMGB3
LOC101060275///NPIPA5///NPIPB5///NPIPB11///LOC613037///NPIPB4///NPIPB3
LINC00276
SLC6A6
KLF12
CYP19A1
CPSF7
MCM5
ST3GAL6
ABCC10
INHBB
MIGA2
SPATA24
MYBL1
CASC23
APOE
PPP1R26-AS1
PCDH1
TRIM8
STK36
LOC100652911
HS3ST2
C1QTNF5///MFRP
TSC22D1
OVOL2
PITRM1-AS1
ANHX
PWWP2B
PSMG4
NUB1
LOC100130357
NDUFV1
UNC5C
LOC105377134
LMO4
ZAP70
MIR1178///CIT
LOC441204
JPH1
MROH6
LOC100289061
SLC5A12
DDIAS
DAP3
INTS4
DPEP3
HSD17B14
DHX37
CALCA
KRTAP10-11
LSMEM1
UGT8
PARPBP
HNMT
TNFSF4
ZFP92
SMARCC1
LOC105371046
MSTO1
METTL26
GLYAT
PARVG
UBE4B
CCDC88C
UBE3D
TMEM52
PPP1R35
CDKN3
BCAN
POFUT1
FBXO43
PATZ1
TGOLN2
WDR72
AGMAT
SCLY
FAM149B1
PTPRS
MAPK15
ELK4
EML2
HDAC7
YIF1B
PDCD11
BSND
BICDL2
BRAF
LAMB4
SLC25A3P1
ARMC6
ST14
ZNF672
GTF2IP12
D21S2090E
TMEM65
BCL2L1
SSUH2
THRSP
ZNF865
NSUN5P1
LINC00315
NXPE1
EARS2
VPS9D1
LINC01004
ECSCR
RANGAP1
APOC1
SEC14L3
ERVH48-1
VASH1
LINC01088
SLC48A1
CDH24
ZSCAN1
MPZL2
SLC30A3
LOC101927826///FBXO41
SLC26A1
CDKN2B-AS1
COL7A1
LINC00588
LRRC14
HMHB1
CPAMD8
NME8
SBK1
IGHV7-81
CACNG4
ZNF365
AKAP3
NR6A1
MCM6
MIS18A
SLC6A19
ATP10A
LOC101928274///VSIG10
TMEM63A
SMC2
DIAPH1
LINC01505
WNK2
ZFP69B
TFAM
CD276
TRIM66
LOXL3
NR5A2
MIR6758///MARS
SLC1A7
JAG2
LOC286359
RPS6KA4
SLCO1A2
MX2
FAM163B
IGHM///IGHG1///IGHA1
SMURF1
RBM15
ZNF48
SPDEF
SNRNP48
LOC100507258///CA13
HPDL
C21orf2
LARGE1
CYSLTR1
2022-09-02
DCDC2
CDCA7
TNR
ACTR3C
ARHGAP39
USP19
PNO1
RASGRF1
COL20A1
SCAF4
FOXN3
TMEM161A
DUXAP10
SLC8A1
RIMS2
GJD4
DNAH1
S100A4
SIKE1
CDSN
SNTB1
SLC45A2
BSPRY
QPRT
SCD
TYRO3P
CSTF3
FLG
PAQR6
ARPP21
OR4D2
FABP7
RABEP2
TNRC6B
MLLT6
TXNL4A
LRP6
TRIM43B///TRIM43
ZNF146
APOA1
LOC100996724
DIAPH2-AS1
KCNMB2-AS1
FAM83A
TOMM5
AUP1
DSCR10
CASP2
POLQ
GGT7
STYK1
TRIM25
ALS2CR11
GPR17
TIGD5
CHKB-CPT1B///CPT1B
GJC1
SRRM2
TINAG
PSMA3
CH17-360D5.1///NPY4R
TSC22D3
LYPLA2
GPM6B
ACTL7A
RASSF4
FXYD3
UCA1
CCDC167
NPTX2
CIB2
THRAP3
IPO13
CLEC5A
HNRNPU
MSL3
PALM3
H2AFX
FAM71E1
LINC01222
ARHGAP27
TNFRSF9
MYL10
CES1P1
ZNF3
MIR4647///SLC35B2
NRG1
PCBP4
KIF6
SH3GL3
EPS8L1
ADGRF5
IGF2BP3
ZNF496
FAM65A
NUAK2///AKIP1
NLRP9
ITGBL1
TMEM45B
HSPG2
LINC00996
PPP1CA
MUC5AC
MAPT
STAB1
ABTB2
LOC100996792///MAP2K3
IGF2BP2-AS1
SLC25A29
NR1H3
FEN1
SYN2
PXDN
PUS7
MIR6837///DBNL
ADAM12
ROCK1
SLC12A3
VCAN
NRG3
MXRA8
MRPL42
ORAI2
CAPN9
THSD4
LOC105373878
MIR146A
LOC100630923///LOC100289561///PRKRIP1
B4GALNT3
GATA3
LOC100507547///PRRT1
AMIGO3///GMPPB
C5orf46
MRPL52
SNAPC4
LPCAT1
CYB5RL
FLJ90680
HIRA
NAV1
RMND5A
PRKCSH
FLJ23867///QSOX1
ARPC4
[truncated: 6,343 more rows]

## Sheet: GSE38666+upregulation
GSE38666
SPON1
LOC100509445///LOC728715///OVOS///OVOS2
DTL
CENPF
CDCA3
PTTG3P
MCM10
KIF20A
NEK2
IQGAP3
ESPL1
ESPL1
LRP8
SOX17
LOC101928554
MUC1
KIF4A
SLC4A11
KIF18B
DEPDC1
TPX2
ZWINT
RRM2
BIRC5
NUSAP1
MKI67
CCNE1
CDT1
BUB1
S100A1
KIF2C
LOC102724312
KIAA1217
AURKA
WFDC2
NCAPG
UBE2C
RAD51
HMGA1
CCNB2
NR2F6
GLDC
SORT1
C1orf106
BUB1B
LOC100129098
PAX8
MTFR2
PRR11
CKS2
NFATC2IP
EME1
C12orf56
PCDH19
VEGFA
BSPRY
SPON1
SLC2A1
CELSR3
SNTB1
AIF1L
SFN
CDC25A
UHRF1
MICALL2
PLEKHG2
SOX17
NCAPH
RMI2
SPON1
LHX6
SPAG5
DTL
LZTS3
PAX8
MIR24-2///MIR23A///LOC284454
MECOM
DTYMK
TTK
NUF2
ORC6
PRAME
CXXC5
ERCC6L
MCM4
CBX2
CENPU
CSPG5
FAM83D
CENPF
PABPC1L
LOC101929219///C1orf186
PRC1
CXXC5
GLI4
KLK8
GJC1
OVOL2
PSRC1
ERFE
NEIL3
POLQ
GGCX
SORD
TMEFF2
CCNB1
CD24
STON2
SPAG11A///SPAG11B
LOC105369635
PSAT1
ADA
SCRIB
ARAP3
APOLD1
KIAA1217
BBOX1-AS1
FLT1
SYT11
FZD2
MREG
MCM10
MELK
PRIMA1
RNPEPL1
AURKA
CDC20
RRM2
FANCA
S100A13
TROAP
GINS4
CHEK1
JUP
SLC35F6///CENPA
FOXM1
CD24
EZH2
TFAP2A
KLK7
EMC3-AS1
PANK1
CXXC5
BOLA2B///BOLA2
CENPI
CDC25C
HMMR
KLHL14
MICALL2
CHTF18
ASS1
SFN
RACGAP1
SLC26A7
MIR6840///STAG3L5P-PVRIG2P-PILRB///PILRB
LOC100507353///CACNA1A
GGCX
MTHFD2
OIP5
ATAD2
VEGFA
FOLR1
CDCA5
MCM2
PIF1
WHSC1
DEPDC1
PBX2
STC2
FANCI
RUSC1
TK1
C9orf16
LOXL2
PFKP
GINS2
LARP6
L1CAM
NUP210
INPPL1
OR7E37P
NONO
PTTG1
MAL
RAB39B
FANCD2
STIL
BLM
PDIA4
CDC6
ALPK3
HOXB9
PTPRG
DYRK2
DNMT3A
SULT1C2
NOX4
ESM1
ZNF512B
CDC45
TMC6
CCNA2
MIR21///VMP1
DDX11
ELF3
TMSB10
LGALS9
LZTS1
FGF18
THSD4
CD82
LOC81691
KPNA1
GLDN
WDR55
GINS1
SFMBT1
MROH1
RASAL1
GAS2L3
CRABP2
XKR4
KIAA0101
SPC25
SIRT6
CTPS2
ESRP1
KPNA2
CDH6
SORBS1
LOC101930655///C7orf73///SLC13A4
NOTCH3
ICA1
SLC39A4
ARMC2-AS1///ATP5J2
DNPH1
EPB41L5
CBS
LOC105379499///FLJ45482
LOC100289283
CCM2L
GNGT1
COL4A2
TMEM38A
PRR5-ARHGAP8///ARHGAP8
EXO1
E2F2
MIR6756///MCAM
SYT13
HIST1H2AM
RALGAPB
SLC19A1
SYNM
OCA2
CDH6
MECOM
UCP2
PLAC1
DBN1
LSM4
GALNT2
LAMC1
ZIC1
FAM171A1
FOXA3
ST6GALNAC1
GCAT
LIMS4///LIMS3
CP
BCL11A
WFDC1
DEPDC1
AP1S1
MPZL2
CENPK
CFL1
PLXND1
ATXN7L1
LOC101927929
E2F7
LINC01215
SLC52A2
CD24
DNMT3B
ALOX12P2
ABHD11
DENND4B
KNL1
FDX1L
LINC01296///DUXAP10
PRRG2
C5orf34
POC1A
PACSIN1
CEMIP
MRPL52
APBA2
PGGHG
ZFPL1
EPCAM
SLC44A2
RPARP-AS1
LOC101928269///LOC100506403///RUNX1
CX3CL1
VWA1
NTN5
PACS2
LOC101927377
PRR5-ARHGAP8///ARHGAP8
PAQR4
CDK1
MIR612///NEAT1
ZNF142
RNF183
TANK
FOXH1
SEMA3F
LPCAT4
PRSS2
CMTM7
LARGE2
STON2
COX5B
GPR137C
ADAM5
FOXP4-AS1
CHEK1
KAZALD1
FJX1
ACVRL1
GDF11
ADRA2C
PTX3
SPC24
SHMT2
SMG5
CP
DPP3
DIRAS2
HDGF
EXOSC4
TRAF4
NOL4L
SMIM22
TOP2A
RECQL4
MPZL2
MSTO2P///MSTO1
TMPRSS4
KCNG1
RNFT2
CATIP-AS1
LOC101929219///LOC100505650///C1orf186
TBC1D20
SLC34A2
ARRDC3-AS1
EBP
LOC648987
LOC101060373///NOMO3///NOMO2///NOMO1
CEP55
GSTP1
SAPCD2
PABPC1
GAPDH
LDB1
SZT2
CD24
TMEM44
CDC7
NRP2
LOC101930655///C7orf73
LRP8
SMAD6
CEP70
KMT2D
MIR6845///NRBP2
PNPLA2
BZW2
PROM2
ADGRG1
BLACAT1
TMPO-AS1
U2AF2
LOC105376796
GRAMD2
CDKN2A
FAM64A
MIR1204///PVT1
TNPO1
ARF6
TSPAN12
FAM155B
HIST2H2AA4///HIST2H2AA3
TAZ
SPOUT1
MXD3
VSIG10
PRORSD1P
OR7E12P
HS6ST1
MYO10
FLAD1
JAK3
DMWD
SYT11
LIMK1
IPO4
CLMN
CDC6
MIR1306///DGCR8
LOC101930583///GOLGA8B///GOLGA8A
MAGEA10-MAGEA5///MAGEA5
KCNQ3
ZNF627
FOLR3
CD24
MAP4K1
MSX1
FANCI
ECT2
TSTA3
RIMS3
CD93
ECSCR
2022-09-08
WNT7A
FLT1
BARD1
CYYR1
PNMA3
SYTL1
NPM2
HIST1H2BD
TMEM125
SNHG17///SNORA71B
MEOX1
CDKN3
MIR5193///UBA7
LYPD6
VCAN
TCF3
FAM174B
BCL11A
ZNF789
ARHGEF39
CALR
ASL
CKAP2L
RGL2
CHCHD10
BIRC5
PYCR1
PKD1L1
PPP1R14B
RABL6
MYH14
PSG1
DTYMK
MGAT4B
RAD51AP1
DNAJC21
CSPG4
HELB
SLC6A8
DHRS13
MED20
LOC100130502
LHX1
HEY2
ERV3-2
KIF23
SLC25A16
C19orf60
ATG101
LOC100507670
EMID1
MATN1
RNASEH2A
SCUBE3
KIF14
RPS19
GCDH
LAMTOR5-AS1
SMIM4
WWTR1
CTPS1
RNF157-AS1
ANGPT2
TMEM63A
RAB26
CSK
PFKFB4
LYNX1
CENPN
ZC3HAV1
LOC101928271
CP
TTC39A
EPT1
ATAD2
FPGS
ASRGL1
KCNMB3
RAD54L
KIF1A
MCAM
CDH6
TACC3
CHAF1A
NKD2
MIR7112///BOP1
SPRYD4
RIPPLY2
AGFG2
PPM1H
DPY30///MEMO1
PAK6
RAPGEF3
TRNAU1AP
FAM174B
SRRT
GRHL2
MND1
ZNF552
MCM4
TRIP13
TP53I11
LHX4-AS1
TIMELESS
RCCD1
CDKN2A
VMA21
ENG
RC3H1
RHBDF2
ELOVL6
GATAD2A
CBS
SUSD4
SHANK3
FMNL3
HRASLS2
GATAD2A
PITPNM2
NR2C2AP
TSPAN15
USP35
MANEAL
TM4SF18
SUSD4
MRPS18A
GPT2
TUBD1
FGF18
GEN1
NSUN5
GET4///SUN1
HIST2H2AA4///HIST2H2AA3
INSL6
RELT
TMPO
NACC1
TRIM42
LINC00665
ATE1
HK2
PTCSC1
BHLHA15
TOP2A
CSRNP2
GFM2
BIK
CTC-338M12.4
ELF3
WDR90
LINC01296///DUXAP10///DUXAP8
BRD4
PPP6R1
CDH6
SAMD1
MMP7
MKI67
USP28
ZNF503
TNF
GPR158
GUCY1A3
SHPK///TRPV1
MARVELD3
DPP9
SNORD77///SNORD76///SNORD74///GAS5///SNORD44///SNORD47///SNORD80///SNORD79///SNORD81
HKDC1
TNNI3
ZNF142
SST
CLDN3
LOC100506274
LETM1
EPHX4
KDM4C
LINC01297
CDH6
RCC1
TBC1D7
ARF3
PLXND1
LYPLA2
TNFRSF12A
NAV2
ING4
KIAA1524
DUS1L
TMTC1
CHST1
LOC105369739
MYO19
ZNF467
VWF
SOX13
LINC00884
LINC00454
FANCE
TAPBP
HSPBP1
DNMT1
MIR424///MIR503HG
PCDHB8
ADCY4
KIFC1
HELZ2
KIF18A
KIF14
SKA3
DEFB1
GJD3
KCTD1
COL4A1
JPH3
INTS5
MYO10
C22orf42
KLK6
S100A6
MAP4K1
CDYL
KDM5C
UNC5A
GGCX
MMP11
SPSB1
TLCD1
INF2
CCNB3
LOC105378948
NRTN
CDCA8
MIR6834///PFDN6
POLH
LINC01405
GSDMD
PEA15
METTL26
GTF2IRD1
LOC100287852///FAM136A
TMEM147-AS1
SLC12A7
KCNT1
LOC100505942
HIGD1B
CASP2
AUNIP
HAPLN1
FGFR1OP
MRVI1
CRTAC1
TPI1
LOC439938
LOC100507634
SBK1
NCAM1
BIRC5
C12orf73
LINC00173
SLC38A10
KPTN
DNA2
RAP1GAP
E2F1
FILIP1
GPRC5B
ATP6V0B
LINC01312
CCNY
CDCA2
GRK6
BDH1
GOLGA2P5
LOXL2
SEC61A2
SEC61A1
ANAPC7
DEPDC1B
DDX3X
WDR91
PLXNA1
HAUS5
PLEKHH1
TSC22D1
TXNDC2
FOXN1
NECAB3
C2orf82
VCAN
LINC00636
C22orf34
SCLY
GPBP1L1
DOPEY2
ARPC5L
TRAK1
NSUN5P2///NSUN5P1
FBXL18
OVOL1
HEYL
ESPN
LEMD1
ST8SIA2
KIF15
YME1L1
ZNF592
RGS16
LOC100288637///ARHGAP11B
SGO1
TMTC1
THUMPD3-AS1
DGAT1
COX8C
LOC401261
LOC285812
MYO10
DGKK
ERVFH21-1
NAA38
ILF3
CCDC130
SFMBT1
MCL1
FBXO46
MYO10
ZNF710
PACSIN3
CABYR
FGFR2
MROH2A
TSEN54
CASP2
TEAD4
CELF1
LINGO1
LOC100505710
EFNA3
HMGA2
DSCR10
LOC101929219///LOC100505650///C1orf186
KRTAP10-11
NETO2
DNLZ///CARD9
KCNK12
GSPT1
LINC01618
C17orf96
RAB15
WDR43
BORA
SCNN1A
GMEB2
CNPY3
ERVMER34-1
RFX5
HDLBP
CDK1
CLDN19
LCN12
LOC100505609
BCAN
HMGXB3
ITGA7
PYM1
SLC39A14
C16orf59
KCTD1
OSBPL3
ZBTB42
BOLA2
ESRRA
AKAP3
SFRP5
CTHRC1
RUNX3
AMN
MNT
VAMP1
SNN
MKRN2
COL20A1
STC2
TUBA4A
SNORA60///SNORA71E///SNHG11
MIR6758///MARS
IGFLR1
SMAD6
BCAN
NCBP2
WNK2
RTFDC1
HOMER2
TRIM8
FANCG
MBD6
FAM83H
ATF6B
LCN2
SRPK1
RBM15
NOCT
YIF1B
SNHG17
MIR1178///CIT
OR9A1P
ANP32E
COL9A2
COL4A1
PKM
TPCN2
TRMT1
KIR3DL3
C1QTNF5///MFRP
C11orf71
RNF40
PEA15
DSCC1
LOC780529
CYHR1
PPP4R1L
ZNF710
RANGAP1
EXOC3
COL12A1
MRGBP
SLC2A12
FOXK2
FEN1
CNPY2
NUAK2///AKIP1
KPNA4
LOC100129516
TRIO
LGR6
EML4
EHF
NPM3
SMIM11A
HIST1H3F///HIST1H3B///HIST1H3H///HIST1H3J///HIST1H3G///HIST1H3I///HIST1H3E///HIST1H3C///HIST1H3D///HIST1H3A///HIST1H2AD
TBC1D5
SDCBP2-AS1
TSR2
GOLGA6L2
LRRC41
LARP4B
CORIN
GDF11
CDK1
LOC101927523
FOXN3
COL13A1
HLA-DOB
GPSM2
CA5BP1
SLC4A7
DLGAP4
OVOL2
LINC00523
RAB7A
COX6A1
PALM3
RDM1
SLIT1-AS1
MAP2K6
FARSA
C15orf39
RGS19
VPS9D1
KCTD1
PECAM1
UNG
MIR6834///PFDN6
ZAP70
VEGFA
KIAA0040
LRIG2
CD93
UNC5C
ARF6
PDE11A
JMJD1C-AS1
ITGB2-AS1
DLGAP5
JAG2
TJAP1
MKI67
LIX1
NEURL1B
PRSS22
CLDN6
SLC23A3
ARHGAP27
CASQ2
NES
CBX2
KAZN
SHROOM1
AATK
ME3
COL7A1
ZNF384
C17orf80
TMEM53
DAP3
LOC102725383
ZC2HC1B
NCDN
UGGT1
TCF3
LOC101928274///VSIG10
MARVELD1
MAT2A
KDM7A
CD47
MYO10
TIGD5
MATN4
MIGA2
ZNF843
HAP1
CADPS
BCL6B
ECSCR
ZNF48
ANGPT2
VASH1
POMGNT1
ULK1
FRMD8
KANSL1-AS1
SLC48A1
LOC101928047
ESAM
KNOP1
GNAS
TMTC4
DIAPH2-AS1
TMTC1
TOP2A
KCTD17
ELOVL5
MAGEA1
SKIL
TRIB2
FOXR2
ZNF496
BICD1
MIR4640///DDR1
SOX12
PRKCH
TIGD1
TBC1D10B
LOC101927849
ZNF783
LOC285043
HIST1H2BK
CLEC18A///CLEC18C
STON1
CD24
PPP1R35
OXLD1
ST18
IBSP
PHOX2A
SLC6A2
TRA2A
PABPC1L
XPR1
ATF5
DLX6-AS1
RPL38
ARL6IP4
UQCRQ
ZNF391
F11
MIS18A
GFOD1
HMHB1
RPAP1
CNP
AUNIP
IGHM///IGHG1///IGHA1
OTOS
LOC441204
CHPF2
OR5K1
LINC00674
CDCA7
C21orf2
C8orf82
LOC101928269///LOC100506403///RUNX1
TSC22D3
CCSAP
TM9SF4
MKI67
WDR72
CENPN
RTN3
LINC01271
SGTB
MCM10
HIP1R
NCAM1
FAM110A
SRA1
NOL10
CT55
MCF2L
PLEKHH3
CCL28
TMEM184B
NT5DC4
PCBP4
KAAG1
RRBP1
MIR142
ABCA2
DVL2
EPHA1-AS1
CARMN///MIR145
LETM1
H2AFX
LINC01138
POC1A
ATP2A3
KIF20B
LOC101927539
LINC01222
MX2
FLVCR2
PXMP4
STK38
NUB1
FMNL3
ELK4
SSMEM1
DPEP3
LMO4
FOXD4
LOC440982///ZIC1
QPRT
PIWIL1
DIP2A
LOC105371046
CNKSR1
HCRT
ACTL7A
TMEM139
PPP1R3E
PRKCSH
SOX9
HIST3H2A
CDCA3
RPL32P3
MYO3B
LINC00315
MBD1
FEN1
PRSS2
L3MBTL1
CCNE2
CCDC36
TBC1D9
SPDEF
C2CD3
BORCS8
ANHX
LOC100288966
B4GALNT3
SCARNA13///SNHG10
NUTM2B///NUTM2A
IKZF1
SOGA1
LRRC14
GPR19
XDH
RAB26
SIPA1L3
NIPSNAP1
CXCL13
PPIL2
COL9A1
TCIRG1
SLC2A1
MAPKAPK2
ARHGAP39
JAG2
MRPS15
HSD17B14
LOC101927826///FBXO41
LINC00184
NUP210P1
LOC150051
PSMA3
LOC441666
MREG
TNNT1
PIK3C2B
LINC01089
ZFP92
SLC13A5
RPRD2
TBX2
GLRX3
NKX3-2
PPARD
MTFP1
ATP5S
HIRA
FABP7
HIST1H3D///HIST1H2AD
GSDMC
CDKN2B-AS1
ZHX1-C8orf76
GPSM2
SLC35C2
SEC14L3
LOC101929036///PAH
SLC26A1
RASAL1
DAG1
KLK12
AGMAT
NDUFV1
BTBD11
TJP3
LOC101928841
NONO
RXFP1
HMMR
LOC101929662
BEND3
TCF3
CDSN
C18orf25
AMIGO3///GMPPB
TRMT1
EIF4E
RNF144B
LOC100506175
MIR6758///MARS
ARPC5L
FAM224A///FAM224B
NR2E3
CAPN12
KRI1
ADAM12
PCBD2
COL18A1
SEMA5B
DKFZP547J0410
RAPGEF5
NCAPD3
DEFB126
ASPM
RUSC1-AS1
LOC101929007
UQCC3
UNC5B
ZNF844
NEB
CXCL16
LILRA4
E2F1
DNPEP
ADSSL1
CABLES1
D21S2090E
SLC5A12
BRAF
CTSA
ZNF672
LOC100507334///LOC100288570///LIMS3-LOC440895///LOC440895
SLC6A19
TAGAP
PRKCI
KIF11
AKT2
PTPRS
CYP26B1
HOXB7
GUCA1A
TMEM88
FUT8-AS1
BPHL
DRD3
CENPU
ZFHX3
MRPL52
MACC1
KLHL25
MRPL12
C14orf2
POTEM
KSR2
EGLN2
OGT
LSM4
TRAK1
PPIH
MAP4
PMS2P2
MUC5AC
PRSS2///PRSS1
JPH1
ATRIP///TREX1
FAM163B
F2RL1
IL36RN
CYP27B1
PDCD11
CIAO1
FAM109A
WIZ
BANCR
SOX13
TMEM102
MIR6840///STAG3L5P-PVRIG2P-PILRB///PILRB
GZMB
ERVH48-1
DOCK9
LINC01333
LOC100289061
BGN
PHKG2
WDR4
ACP6
NUB1
CSNK1E
FAM89B
DIAPH3
SCARA3
LINC01539
SNX25
CYP1A2
LOC100996724
CCNA2
SCNN1G
LOC101060604///SLC7A5P2///SLC7A5P1
PLCZ1
RNF31
KLHL24
SDHC
EHF
PAX8
HLA-DOA
SLC30A3
MMP1
DIAPH1
GUCY1A3
IPO13
CABLES1
SLC17A7
UCA1
TMEM147-AS1
ADGRL4
R3HDM1
PRDX3
TPMT
PKM
LOC105369705
BCL2L12
KHDRBS1
KCNMB2-AS1
ADM5
TFAP2A-AS1
SNORD77///SNORD76///SNORD74///GAS5///SNORD44///SNORD47///SNORD80///SNORD79///SNORD81
C11orf96
BRICD5
CES1P1
PLEKHA5
RHBDD3
KIAA1217
RANBP1
GJB3
SKIL
FBXO43
ZSWIM8-AS1///NDST2
EWSAT1
SERINC2
ADAM8
HOXB8
PRCC
DGKD
LOC285902///ZNF479///ZNF273
C21orf2
NPTX2
CTRB2///CTRB1
ALDH1L2
2022-09-03
NUCKS1
BACE2
MEX3A
CXCR4
ZNF672
COL1A1
INS-IGF2///IGF2
HIF1AN
HMGB3
MCM7
ESRP1
SMAD4
CACNA1D
ZNF865
CENPN
DPM3
LARP4B
TAF1C
TACR1
MYLPF
TAGLN2
MTBP
MAP4K1
PSME4
RNF207
MIR6080///MIR4315-1///MIR4315-2///PLEKHM1P1///PLEKHM1
LOC100996506
CLCN7
ASMTL-AS1
TNRC6B
TMCO6///IK
METTL7B
TFE3
IGFBP2
PXDN
LRP8
HIST1H1A
SMARCC1
NUP210
KCNK10
DDX11
GPR39
FGF11
GIPC3
MIR3658///UCK2
ADAMTS14
RGS3
LOC221272
CBL
GSTZ1
CTBP1-AS2
ADCK2
LOC100507336
GPM6B
C3orf80
ANK1
ROMO1
AFF3
SIGLEC6
PLCE1-AS2
CASKIN2
POFUT1
ATF3
GUCY1B3
EIF5A
LAMA5
MDK
LOC105377134
MRPL2
IGHMBP2
MTA1
LOC101060391
ZNF511
RPARP-AS1
GPM6B
KIF2C
FUT8
LINC00888
MICALL1
TSACC
DNAJC21
LLGL1
FOSL2
TICRR
TRPC4
LRRTM1
TPT1-AS1
C6orf223
FBXL22
ATP2A1-AS1
BCL2L2-PABPN1///PABPN1
ARHGEF2
ILDR1
C3orf67
BDH1
HLA-DOA
LOC101928443
ZNF618
TFR2
ANO9
METTL26
KLHL17
CHD7
PCDH7
LOC100505658
CYYR1
TBX5-AS1
RCOR3
CNPPD1
MINA
FARP2
FLAD1
TEPSIN
SBK1
MIR6837///DBNL
AURKAIP1
LOC101928973
AP2S1
IQSEC3
LTB
PUF60
TSPAN12
PATZ1
HMGA2
UNC79
SCARNA15
SRRT
CYGB
LOC101929368///FKBP1A
CELSR2
MYO6
SFT2D2
RBP1
FKBP4
BCL2L1
SH3TC1
ZSCAN32
OR7A5
GGA2
MTF2
NR5A2
CREB3L4
ITGBL1
SPATA24
SSTR1
CACNG2
ZFAT
CXCL3
LINC00494
ZMYND19
FAM124A
MMACHC
MESDC1
BLOC1S1-RDH5///RDH5
SYNGR2
SSUH2
DDI1
CHD8
SLC39A13
ZNF469
SLC25A3P1
LOC100507564
TGFB3
PART1
TPI1
HAPLN1
ENGASE
PPP1R26-AS1
CDC42SE1
CTAG1A///CTAG1B
LLGL2
CHEK1
PAX8
ATRIP///TREX1
PBK
MUC16
LOC286359
UBE2H
SCARF1
GPR39
FZD10
ZSCAN1
LIPG
RAB17
PGM2L1
CNTN5
IQCF5-AS1
TLE3
CPA2
HLA-DOA
SYK
ATP6V1B1
UBE4B
SRRM2
LSM14B
ASRGL1
FAM69B
PARVG
EEFSEC
PTH2R
ZNF396
NR5A2
USP26
NEMP2
ITGA9
RNF144A-AS1
SFXN5
VWCE
ARHGDIA
INO80D
ALDH1B1
TEAD3
LOC283335
SDC3
SNHG4///MATR3
MUC1
RXRB
ANKS4B
VDR
CDH24
LIPH
PKP1
TSR3
RHEBL1
AUP1
AIPL1
OTUD5
FKSG49
CCDC167
TBX1
MAGEA11
STX6
PMVK
ELF3
PRTG
TFAP2A-AS1
FEZF2
ADCY5
TCEA2
NCAM1
CCDC171
WHSC1
GPATCH4
LEXM
TMEM65
LPL
GAK
LOC100129198
PLEKHM1
WSCD2
TREML1
MRPS26
SMARCD1
LOC102724993///LOC101930075///NPIPA8///NPIPA7///NPIPA5///NPIPA2///NPIPA3///PKD1P1///NPIPA1
PWWP2B
SLC8A1
LINC01346
LOC102724362
LRRC32
MIR21///VMP1
GALK1
PRSS3P2
TEKT5
LTBR
TRPM1
ARHGAP1
LOC100288570
ELMOD2
OR4D1
PML
PSAT1
GJB1
SFTPC
ARHGEF25
GLIPR2
BCL2L1
TCEANC
PPIL2
UBE2N
APOA1
DGKZ
COX5B
RUNX2
KRT14
GUSBP2
NLRP1
PNN
GALNT8
RASGEF1A
TFDP1
GNRHR
LOC101929027
ASAP1
DUSP9
RIF1
SPHK2
LOC613266
KRTAP3-1
LOC100506405
SMCP
HIGD2A
C9orf16
GPSM2
MEIS1
PHLDA1
C10orf99
SASS6
ARFGAP1
TSHB
TAOK2
SQLE
NR2C1
EXOSC4
UBAP2L
PDE9A
DBN1
KIAA1644
TCEB2
BTNL9
FGF3
PPP1CA
PRND
MCM6
MTRF1L
H2AFX
LOC339874
FAM72A///FAM72D///FAM72B///FAM72C
TRIM16L
INHBB
STX17-AS1
PLEKHG2
C9orf40
KRTAP4-1
GRAMD1A
LINC01545
NEK4
JPH1
PTPN23
LINC00664
2022-09-02
SMARCC1
NPY2R
LINC00598
LRRC8D
NALCN
MGAT3
LYG1
C5orf64
ZKSCAN5
PAX8
CR1
SYNGR2
PRR14
IL1RN
MEX3A
GCC1
ACACB
AURKB
LOC105373113
ENDOU
RNF207
EMC1
PMS2P3
THY1
LOC102725343
ORC1
WRNIP1
HIST2H4B///HIST4H4///HIST2H4A///HIST1H4L///HIST1H4E///HIST1H4B///HIST1H4H///HIST1H4C///HIST1H4J///HIST1H4K///HIST1H4F///HIST1H4D///HIST1H4A///HIST1H4I
XCR1
SMIM21
CKS1B
KCNA2
POR
CP
C5orf46
MAP4
ZDHHC23
PATL2
SOCS7
LRRC61
YARS2
LOC730101
AP1S2
FANCD2
BARHL1
STAB1
CERS4
APBA1
TMEM161A
TSGA13
LOC100132005
PSD4
LOC101929752
MIR943///NELFA
TOP1MT
AJAP1
ATG4B
RAB1A
PAX6
NAGLU
GJC1
KNL1
DHRS4-AS1
STX1A
FUBP1
ZFP69B
TNR
LMNA
LOC646522
HAPLN1
POU2F2
PKHD1
PCGF5
TBC1D16
MAPK13
SIRPD
LOC100996345
BFSP2
LDB1
RIPPLY1
GPR17
PDE4D
AURKAIP1
FGF8
ADAM21
RBM25
TECTA
SLIT1
LOC286083
F11R
SOX9
CABYR
SAP25///LRCH4
IGF2BP3
SMG7
POLR2J
HIST1H4H
TP53INP1
VPS8
ACVR1B
ARG2
EME2
FKBP4
KAZN
OXLD1
PBX4
ST3GAL6
BAG6
CNTROB
TRIM11
WDR97
REG4
PTGER1
FKSG49
MSL3
LOC284379
CENPO
PSD4
WNT5B
EPS8L1
CALCA
ATP5G1
WISP3
PGM2L1
SUV39H1
PATL1
PQLC2L
TPI1
C19orf70
CADPS
NSUN5P1
INCENP
SIKE1
VCAN
EPHB3
KIFC2
KCNK3
CRABP1
GPR173
DNAJC3-AS1
FAM47B
NEK6
LOC101928526
DESI2
ICOS
ORM1
ATP6AP1
CHCHD7
FAM69B
LOC100505782
LINC00470
FLJ90680
LOC101930349///LOC101930344///CGNL1
MXRA8
SLC25A33
TMEM161A
CCNB1
ZGRF1
GS1-124K5.4
ARRDC1
CLDN7
ZBTB45
MAP3K15
LOC101928847
NSUN5
NME8
HDAC8
NETO2
CLRN1
CSTF3
GATA3
LOC101928269///LOC100506403///RUNX1
ADD2
ASAP1
FBF1
KIF27
RTKN
TYMSOS
GABPB1
ALKBH6
MSTO1
LDB2
FAHD2A
ZSCAN16
PDE5A
GART
ADAMTS16
IZUMO4
ACTL8
PARP10
ZNF827
TMEM221
DERL1
LOC100289090
NUP62
ALDOA
RPL37A
HSPA12B
PPP1R3F
MINK1
HOXB4
LINC01056
EP400NL
PGP
SNORD68///RPL13
FAM122B
HTR7
SCGB1D2
MEIS1
B4GALT3
TECPR1
IKBKB
LOC285819
SLC1A3
CEP72
B3GAT1
PDE4A
TCL1B
NLGN3
IGF2BP2-AS1
PTPRB
SRD5A1
UBR4
FGFR2
RALGPS1
TK1
E2F8
MBD6
CCDC74B///CCDC74A
CSMD2
NXPH4
MINCR
HIPK1
CNGB1
STK36
DRD2
ADGRG1
CCKAR
KDM2A
PEX11G
2022-09-04
PDE4A
MINK1
LOC101927180///ATP6V1F
ATAD5
TMEM52
GPR4
PPARA
LOC101929177
S100A2
IL17RA
OR51B2
DPP7
LOC102724814
UNC13D
HMBS
UGT2B17
SUSD2
AGPAT2
C7orf49
PPP1R12C
KDM6B
PTOV1-AS2
NIPAL4
SAC3D1
MMP14
HN1
NUP153
PPARD
RPF1
ACP1
LOC648761///FAM201B
LOC100630923///LOC100289561///PRKRIP1
LINC00484
DOLPP1
SOX12
ACHE
SEPT7P2
MEX3A
VN1R5
LYRM4-AS1
ARHGAP33
TRIM66
LOC284240
LINC00598
RNF212
NBEAP1
SETD4
LOC285422
MAST1
TJP1
UBE2QL1
MIR4454///ESRG
DPPA4
OCLM
LOC101928589///TMEM164
ZNF692
ADGRL1
MYL10
TMEM169
SYMPK
NAT8L
LINC01260
PRDM15
ODF3B
CLEC14A
HPDL
IRF1
MIR4640///DDR1
CIZ1
COL23A1
NAV1
TPM1
TEAD2
ISM1-AS1
ISCA1
S100A14
TVP23C
TNK2
CNDP2
FAM219A
FGF6
USP19
FANCA
RAB3B
LINC01004
GSX1
IL4I1
HNF4A
WFDC10B
ST14
BAZ2A
VTI1A
FLJ46875
SCRN2
LOC101928160///ZNF707
LOC100507468
TMEM144
MTX1
HIP1R
CCDC33
COL6A3
TGOLN2
SYN2
LOC286178
[truncated: 10,680 more rows]

## Sheet: GSE40595+upregulation
GSE40595
CDCA2
OR7E12P
CSMD2-AS1
PROSER3
LOC729173
POLQ
ASXL3
ACACB
TPRXL
LOC642533
NIPAL4
ITSN2
LINC00491
MPV17L
DLEU2
GPR52
BCAP29
KLF15
VHL
LCE1E
NCKIPSD
FUT6
ARMC4
LOC105375273
FAM81A
SNHG17///SNORA71B
GNAO1
BLM
C20orf203
OR5L2
MYLK4
EPOR
LOC100507670
IL9R
GRK2
RNF157
GNAO1
CATIP-AS1
LOC101928635
ERVH-1
CASC23
ACTR3BP2///ACTR3BP5
PEAK1
YEATS2
MYH14
PAX8
XDH
FBLN1
LOC93444
LOC100505918
LINC00589
HRK
DKFZp451B082
TCP11L2
RRN3P3
LOC100129603
CADM3-AS1
SMG6
SPATA32
NEDD9
KRT2
WFDC12
MIR3150B///MIR3150A///LOC286149
LOC105373418
SLC4A8
ZNF664
LOC100130502
PRAMEF11
CDC25C
LOC105370943
LOC101929279
LINC01181
LOXL4
SV2C
PSG9
ACAN
MYCN
OR10A5
SPATA24
ZC3H13
MECOM
NUTM1
ST3GAL6
AK8
LOC100996681
SERPINB8
GAD2
CCSER2
LOC100505711
IL1RL1
LOC101928269
UVSSA
MESP1
TMEM72-AS1
POMK
ACTN2
LOC100996906///CDRT1///FBXW10
SLC29A2
ELL2
LOC101927933///LRRC8C
WDR27
CD80
MGAT5B
PML
SETD5
CLEC1A
DSCR9
GNAO1
OR7E104P
RAB7A
ATP13A5
LINC00520
NR6A1
LOC105372761
HOTTIP
PGLYRP4
CDT1
FUT6
OR51B6
MYH14
LINC01359
HPX
C8B
ADCY5
NAV2-AS4
CENPE
ASF1B
KLHL14
RAD54L
LOC100509646///PRY2///PRY
TMEM169
TRPM6
ATP11B
CADM3
OR1A1
SLC36A1
FBXL18
SMCP
CXorf36
PKNOX2
KRT82
ACKR2
DEFB4B///DEFB4A
RIDA
LINC01210
FYCO1
ELF3
JPH2
LOC102724352///LOC101930593
MUC5AC
MECOM
UCMA
CALCOCO2
MORN1
RHPN1-AS1
POC1A
CYP4A11
DEFB106B///DEFB106A
ABHD11
GPRC5D
LOC100130456
CDYL2
KLF7
FAM120A
TTTY11
CHRNA5
KCNQ3
LOC101926984
TROAP
OR1J2
CETN1
TRIQK
SLC25A35
SERPINA9
PLXNB2
CACNG6
POLQ
HIST1H3E
SLC8A2
LOC105369748
LOC100507388
IVL
GSX1
TDRG1
SMPDL3B
LINC01144
IGHM///IGHG1///IGHA1
LINC00689
CD24
DNAH11
HDGFL1
LOC149703
FLVCR2
CABP5
M1AP
RHEBL1
C10orf99
MC2R
LOC105371708
LOC100132731///KIAA1257
ZNF507
LOC283435
SYT2
SLC6A13
ASIP
GRIN2C
INO80D
TAF2
GMNC
FHAD1
CELP
C12orf49
AVL9
RAB28
TIRAP
LCE1E
LOC100129098
RTP3
CD24
BIRC5
GSN-AS1
MXD3
HNF1B
BMP15
CLDN4
LOC102724165
LINC00654
WFDC2
AMBN
LRRC25
C19orf84
OR51E1
HSPB6
MYH14
C1QTNF9B-AS1
CYP27B1
GRPR
SRRM4
WIPF3
TMEM108-AS1
FMN1
KCNMB1
SLC24A2
LOC101929549
LOC642846///DDX12P///DDX11
IRF2BP1
LOC101929872
CD6
ZNF843
LUZP4
OR7A5
OR51B5
PITPNM2
DOCK5
PRKCQ
LINC01225
ATP10A
LOC100652911
CC2D2B
LOC100506207
GJD3
NMT1
PRB4
SHISA9
PANX1
PAX8
LOC100133985
GDF5
LOC100505478
PDE5A
BPIFA1
LINC01512
LOC105370622
CD24
TP63
SPATA18
CAMK2G
TANK
TAS1R2
KIR3DL3
CA14
KRT73
TAS2R38
BTNL2
KIAA1755
SLAMF6
IQSEC3
KIR2DS2
LOC101929752
LINC01049
CFAP99
CD24
NPC1L1
UHRF1BP1
PART1
C16orf45
GOLGA6L6///GOLGA6L22///GOLGA6L1
TEK
SLC30A2
CD24
LHX3
CLDN3
WNT10B
MIR124-1///LINC00599
C1orf210
TRIM16L
LINC00408
SENCR
LOC105372695
CHMP4C
CAMK2A
FGFR2
TTC39C
ASH1L
CASQ2
VWA3A
PRPF18
LOC101930568///KRTAP4-6
KRT17P5
LINC00032
CDSN
LOC100506860
SERPINA1
TMEM174
HRH3
OR5P2
LOC100129884
AK7
TERB1
C6orf52
PSG6
MIR6132///ST7-OT3///ST7
GRHL2
PKHD1
MGC2889
CCR4
BCL2L14
FANCA
GLB1L3
GAPVD1
KIF20B
KRTAP4-2
PSG7
FSD1
EXO1
USF3
LOC100419741
KIAA1549L
LEPR
TMEM92
DNASE1L3
IFNL2
ACSF3
LOC100132005
LOC101928985
ALG13
SOX17
LOC102725263///LOC389906
BACH1
PPP1R14D
MRO
ETFBKMT
KIF9
LOC100506047
MIR3681HG
ART1
OR2H1
SF3B2
DPF3
GTPBP1
CCL11
SYNE4
NEK2
ZNF789
MIER1
HIF3A
EGFR
ASGR2
LINC00174
LINC00705
CARMIL1
OR4D2
CSF1
LOC399900
LINC01007
CYP2C9
CBARP
KIR2DS1
CYP19A1
CNR2
RNF207
SYCE2
EFR3B
KRTAP17-1
PHLDA1
CFAP69
KIF5A
NCS1
SLC17A4
STARD13-AS
BPIFA4P
ADAM20
ABCB5
HSFY2///HSFY1
OPRM1
VSTM4
RALY-AS1
EGFR
C9orf66
TH2LCRR
TTTY9B///TTTY9A
GJC1
ZNF787
SOCS7
BCL10
GTSF1L
CELF1
NEK6
LOC101928973
ENO1
IFT140
LOC100101148///LOC541473
KRT75
ADIRF-AS1
ANO7
RPS6KA2
CYP26A1
AFF2
RGMB-AS1
COL9A2
SLC17A9
FAM135B
CD6
FOXN3
WWTR1
SEMA3G
LCT
GJD2
WNT6
TTTY5
KIR2DL5A
IFNA13///IFNA1
HFE
FXYD3
ATP11B
KRT78
GABRB2
ABLIM2
KIR2DS3
ZHX1-C8orf76
EIF1B-AS1
ERICH1-AS1
VPS53
MBD3
FAM46A
KRTAP13-1
LINC00687
FAM181A
FRRS1L
LOC101927884
BDH1
MYL1
ATP2C2
ASB14
SLC2A1
CDCA3
ODF4
DLGAP1
TTBK1
LOC101929398
WFDC1
NADSYN1
ZBED5
BCAP29
LOC101927768
POM121L12
LINC00944
RNF219
ARSG
LINC00293
POM121L8P
NMUR2
SORBS1
LOC101929219///LOC100505650///C1orf186
LLGL1
IFT122
SIRT6
ASB12
PANK1
LOC149373
XAGE-4
OR1G1
HGH1
LINC00668
ADPRH
LOC101928820
APMAP
GJB4
LOC100505530
NOCT
LOC100505984///ITGB6
FAM186B
PMS1
TGS1
RSPH14
KRTAP11-1
FAM166A
SCUBE3
BACH1
LOC440602
BPIFA3
OSBPL1A
SLC1A2
CCDC60
HGH1
SYT15
EME1
NES
GML
LOC102723757
SGO1
MAGI3
PART1
LOC100507073
LOC400655
FAM178B
CP
OR1C1
SLC12A5
CDK15
PLAGL2
FGD2
GJC1
CELF2-AS1
IGLJ3
TMCO5A
PRKCH
GHRHR
RABEP2
PZP
ZFHX4-AS1
KLHL34
MOBP
FOXRED2
INHBC
SC5D
CNP
SOX10
LONRF3
SLCO2A1
DERL3
WFDC2
STKLD1
PAX1
ADCK2
RBM45
MEX3C
WIPI2
NDE1
CCDC178
APLNR
P2RY4
MYOZ3
ONECUT2
NCAPD3
PSEN1
SLC17A7
BMP6
ZBTB37
LOC101930602///SLC14A2
E2F4
LOC400794
LOC101928580
MRVI1-AS1
ENAM
VDAC3
ATP6AP1L
RARB
LOC100507520
ACSM5
OK/SW-CL.36
STAU2-AS1
LOC100129129
NCR1
FAM87B///FAM87A
IL1RAPL2
MKNK1-AS1
TMED5
ARHGEF11
IGHG1
NF2
CCDC57
TNFSF11
APOBEC4
MKS1
WSCD2
SCN10A
MPZ
C5orf58
LOC101929662
MYLK
LOC105376689
LOC100507480
G6PC
LOC100506858
APOLD1
LOC550113///UBA6-AS1
SLCO2B1
LMNTD1
SCD
MIR1199///MISP3
TUBB4A
CCKBR
METTL15
KIAA1217
OR2S2
GLYAT
ILDR1
COPS7B
C20orf203
KCNK9
BAK1
SCAMP5
BTBD9
LOC102725420///LOC102724888
KIF2C
LAMB4
SPRR4
MPZL2
FAM205BP///FAM205A
EPB41L2
SPDEF
LOC101930453///FSTL1
CGA
SLC17A1
SCGB2B2
TREML5P
MUC1
SETMAR
C15orf56
C1orf105
TSPO2
SMIM22
LOC105373434
LOC102723886
STK35
PLAC4
CENPF
ATP23
LOC283177
MS4A1
CD9
RET
KCNQ3
LZTS3
SOX17
FLJ32742///DCAF8L2
PSORS1C2
ASB16
AUNIP
LINC00441
LOC100996345
NLRP1
LOC400748
TMEM229B
GS1-279B7.1
CEACAM19
SYNGR4
RECQL4
PCAT4
PDE5A
LOC643923///ELMOD1
CLDN19
DENND1C
CDIPT-AS1
LOC101929584
NOS1
SV2C
ADAM21
MBOAT2
ACRV1
TSGA13
TRIM62
MYOC
TPD52L3
LOC105376944
PRKCSH
PPARD
SIRPG
NKX3-1
WDR72
DNAJC16
OR7C2
LOC101928476
ZNF287
LOC101927438
PLCD3
LOC101926915
LOC102725207///LOC100996760///ANXA8L1///ANXA8
BRPF3
PRB1
LOC100505902
AUNIP
ATAD3B
HNF4A
KLHDC7A
LOC100422737
MON1A
ERVH-4
SH2D2A
TMPRSS2
PROP1
IFNA17
TRAF4
MKI67
IGSF1
KCNS1
CHI3L1
CYP2C9
SNHG4///MATR3
CNDP1
NLRP1
LINC00032
TTC22
LOC285847
WWOX
LOC101929657
DGCR2
WDR11-AS1
HRG
GNAQ
PPP1R17
PFKFB1
ONECUT2
GKN2
LDB2
KIAA1652
CCDC150
NAAA
HJURP
LYRM4-AS1
C18orf12
KCNIP2-AS1
ACTRT2
USP28
ACRV1
LOC729506
TPTEP1
ZNF527
LOC101929977
Igk
STX17-AS1
USP49
CTBP1-AS2
PCNX2
GPR4
CHN2
RAB26
LOC339666
LOC101928718
AGMAT
LOC100505515
TMEM253
KNCN
FAM30A
KCNB2
LOC100507194
SRRM4
SEC22C
PIRT
SLFNL1-AS1
RENBP
CDKL2
KRTAP8-1
OPRPN
CYP2C9
SPATA12
SPINT3
NALCN-AS1
CACNA1F
KCNJ1
MRPL47
LOC100127938
UGT1A3///UGT1A1///UGT1A4///UGT1A9///UGT1A5///UGT1A6///UGT1A7///UGT1A8///UGT1A10
LINC01622
CD207
LOC100130264
KIR3DX1
PSG1
SEC16B
ZFP69B
CD1B
CRB1
UHMK1
FSD2
KCNMB3
CDKN2AIPNL
ICA1L
LOC100631378
DAPP1
LOC101929552
GSG2
LPAR3
C10orf25
DGKK
ERICH1
PWRN2
TCF25
SORCS3-AS1
ZC3H10
KNL1
SRY
PTK6
CDKL3
DAND5
LOC283194
OR51B4
KIR2DL1
CHEK1
LOC101929683
STAB2
NECTIN4
IQSEC2
LOC100506526
FBLN1
ZNF551
CIB4
REST
PRSS21
ESPN
RNF130
STK16
CPB2
EGFR
APOC4-APOC2///APOC4///APOC2
PTTG1
AK7
LOC101928461
C1orf106
NFIA-AS2
RPL13AP17
GINS4
MUC12
CER1
OLFML2A
RHBDL3
LOC100294033///TCAF1
SRC
TAPT1
NEURL3
MUC13
XCR1
UCP2
ARHGEF39
NHSL1
TROAP
E2F1
BHMT
ADTRP
KCNJ3
PRRC2B
LINC01356
KRTAP4-12
DARS2
WWTR1-AS1
RBMY3AP
LAD1
CTLA4
LINC00508
OTC
RNF144A-AS1
CALN1
TRIM25
HSF2BP
KRBOX1-AS1
LOC100506797
PPP1R9A
TONSL
RBM48
EPS15L1
CDCA5
SLC17A3
ATP5G2
METTL7B
ANKRD26P3
LOC100289473
ST8SIA3
TXLNGY
ERFE
LOC100506374
ZNF836
C12orf80
SAMD15
SLC6A10PB///SLC6A10P///SLC6A8
KIRREL3-AS3
ALG14
FCRLA
ALOX15B
SLC24A2
SOS2
PECR
IPO4
CD1A
TPPP2
KCP
BSPRY
SPATA31D1///SPATA31D3///SPATA31D4
UBE2G2
LOC101928144
WHAMMP2
MACC1
MS4A1
CP
CEP41
ECE2
LOC101928894
LINC00943
TONSL
PLG
SLC6A19
HTR3B
RASGRP3
PLCB1
ARMCX4
OR51B2
UCA1
LINC00216
PRSS33
OR4D1
ARID4B
MYCL
NME9
SRPK1
FANCD2
CYP2C9
GSDMC
ZNF709
PAPOLG
FGD1
LOC101060179///PRDM11
APBA1
GAS7
PDE3B
EHF
RTBDN
KLRG2
BIRC5
FOXQ1
WHSC1
LOC728868
RET
ADGRF3
APH1A
LOC101927950
PKP1
ZNF93
TSSK3
KIR3DX1
ZNF333
KLC3
LYPD3
FAM41AY2///FAM41AY1
PKP3
ACSBG2
FOXN3-AS2
LTB
RRAD
PLA2G3
ITIH2
LOC101927339
RMI2
OR10A3
CASP10
CABYR
TMEM139
CXXC5
DLGAP4
EXOSC3
RCAN1
CNST
LOC105369595
ZNF571-AS1
PCDH7
AIF1
RASAL1
TMEM185B
TEX40
TAAR3
CCHCR1
RASGRF1
LOC100507443
LOC145845
PPIG
AKR1E2
PRB1
CP
PIK3IP1-AS1
CSNK1A1
ULK4
HAPLN1
C4orf26
GLT1D1
TCF20
SORT1
GREB1L
GRIN2A
LRFN4
KIAA0040
VAX2
EME2
PAK6
MAS1
OVOL2
DEPDC1
LOC105370178
FIZ1
KIR3DL2///KIR3DL1
GUCY1B3
SLC39A4
CCDC117
HAVCR1P1
ATMIN
NKX1-1
TSACC
LINC00673///LINC00511
SFT2D3
OR12D3///OR5V1
SUFU
PRR36
HAL
LOC115110
FAM117B
TMEM80
LOC285043
GRB10
LOC101928069
ABHD1
MIR4657///PURB
SLC5A6
LINC01142
ANKRD22
FMNL3
GABRA1
IQGAP3
OR5V1
HNF4A
CD3E
TEX37
KIFC1
BAGE2///BAGE4
ELF3
KLRG2
SLC12A3
FAM205BP
LOC84214
ABAT
ZNF398
EPPIN-WFDC6///EPPIN
LOC646482
LINC00877
LOC105375875
PTPN2
UBAC2-AS1
TMPRSS4
ZNF704
LOC101928132
WDR93
LINC01551
LOC101928741
PRRT3-AS1
KIAA1549///BRAF
MAN1A2
FOLR1
DEFB118
MCF2L
C6orf52
ODF1
KIR2DL2
SOGA1
PPP1R1C
LOC101928841
TP53INP1
FOXA2
NPB
E2F2
SYNDIG1
CIITA
SLC25A5-AS1
NENF
C9orf85
MAT1A
COL5A3
LOC100130502
ZNF548
C15orf39
SP3
KCNN3
CBX2
FAM83D
MAGIX
POU3F1
LYSMD1
HMGB3P1
PTAFR
FAM124A
IGSF3
CLDN3
ZIC3
TPX2
SLC35E3
ITPKC
EFCAB5
PAX8
TEX26-AS1
IL2RA
KLK4
C6orf52
ANKRD36BP2
HIF3A
MIR6756///MCAM
C1orf100
RAB4B
C11orf42
GOLIM4
LOC101593348
CSMD2
SLC5A7
CYP4F2
SLC23A3
TMCC1-AS1
SOX13
AP4E1
KIAA2026
MCM4
KLK4
TGFA
ARL17B///ARL17A
COX6A1P1
DCST1
CALHM1
ESPL1
HDAC5
DOCK7
DSCAM
CD24
GPR19
DLGAP2-AS1
UTS2R
TRHDE-AS1
USP43
LINC00265
CXXC5
HMMR
COL22A1
RHD///RHCE
QKI
FAM71D
TNRC6C-AS1
LOC101926907
CCDC30
CNTD2
SRGAP3
RPS6KA6
LBP
KHDRBS2
MB
TM4SF18
ABHD1
MAPK8
SDC1
CDC45
BCL6B
SYNPR
LINC01225
PLIN5
FGF22
MPZL2
SERINC2
ZFP92
HSPB6
MCF2L
PSAT1
LOC100287525
LINC01314
CSPG5
SAP30L
GPA33
LINC01016
ATP4A
MDGA1
MIR3658///UCK2
MUC1
OSER1-AS1
CHRNA2
SPPL3
FEV
LOC101928554
STON2
KRT8P12
MED23
PSG4
TP63
PRB3
ETV1
LOC646484
CP
FIRRE
SLC44A4
DEPDC1
HAGLR
RMND5B
SFTPB
LOC441086
BSPRY
LOC102724814
ENPP3
FZD5
PSG5
NLGN2
PLCL2
ASCL3
GATAD1
TICRR
A1CF
NXPE4
PAX7
KCNJ5
CCL16
SUSD4
LYNX1
GPR12
TES
NIPAL2
SCUBE3
MEX3C
NENF
ERVFH21-1
CACNA1G-AS1
ADCY1
CCNE1
EPHA8
OCA2
TBX18
ATP2B3
LOC100507395
KIAA1217
SPTBN1
CCDC7
MIR1178///CIT
LOC101927331
GRIN2D
GALNT6
C16orf58
CETP
TCEANC2
MIR3945HG
EDDM3A
ALS2CR11
SV2A
ELMO1
ABHD11
TKT
CROCC
TTLL10
NUCKS1
BMS1P20
IL27
TAL2
CLK3
MAATS1
CHRM5
LOC101927537
SLC22A12
SH3D19
IL16
ASB4
LINC01416
RAB2A
CTNNA3
CKAP2L
GUCY1A3
MKI67
SFTPC
LILRA4
GDF9
CABYR
TANC1
PPIH
LOC150051
WDR55
LINC00537
AURKA
ESPL1
BMX
WISP1
EPCAM
TLX3
REXO2
FAM65A
RAD51
CDCA2
APCDD1L-AS1
LIPE
CSPP1
L3MBTL2
TNFAIP2
FUT6
BDH1
CBS
DTL
TRPM3
FAM124B
PRKCQ
LOC102546299
KIAA1217
FANCI
PRB1
NCAPH
FRMPD3
USP42
ADD3-AS1
GTSE1
TSPY1
RIMKLA
JMJD4
LINC01366
GHSR
C18orf25
ANGPT2
NR6A1
LOC101928123
TAL2
DDX3Y
MTSS1
APBA2
KRT38
ABCC11
PLCE1-AS2
SHANK3
MAPK4
CDCA3
PIGO
LOC101929219///C1orf186
MAP3K19
JAG2
CCDC124
SLC6A12
ZNF295-AS1
STIL
CARD14
AKAP6
RHOH
KLF14
RFC3
USP2
KAZALD1
FUT6
CACNB4
HAPLN3
ATP6V1H
THSD7A
CCDC70
SNTB2
C17orf80
LY9
GALNT5
APOBEC3F
TSPAN12
KCNAB1
GPT2
MAP7
CCL25
PSAT1
RMST
ADGRG1
LOC101928896
NUP50-AS1
EPHA10
RNF157-AS1
SLC52A2
KIAA1161
LOC644090
TTC23L
ALB
CBARP
CAMK1G
MAPT-AS1
SNX19
PLIN5
HEYL
YWHAEP7
ITGA4
LOC101928516
TRIP13
HMGA1
SORT1
MIATNB
SS18
2022-03-01
PLA2G2D
MUC1
LINC01214
CYP2A7
NOVA2
LUZP2
KLHDC7B
CDO1
LOC101928525
FRMD5
SAMD4A
SYNGAP1
BCL2L11
KLHL14
LIX1
PIK3C3
ZNF557
PRPF4B
KIF4A
LOC105373764
SFMBT1
KLK4
LYRM2
PTTG3P
CDRT1
ERCC6L
CCDC140
ZNF280A
TTK
CXXC5
PML
PDE9A
MIR205HG
PRKX
ELF3
TMEM139
ELFN1-AS1
CNBD2
SLC26A8
EHF
KLK6
IL17RB
SLC4A11
WFDC10B
METTL6
VSIG10
SULT1C2
CCNA2
ZIM2///PEG3
OR5I1
ADGRF5
LINC01312
LINC01297
PPP2R2B
LINC00226
C1orf111
CDC25C
ARRDC1
TMOD3
CDCA8
LBX2-AS1
TRIM59///IFT80
TMEM79
MAJIN
CR1L///CR1
COL9A2
KIF2C
PGLYRP3
WDR77
TLL2
MCM10
LOC100510710///GBAP1
NUP62
LINC00921///TIGD7///ZNF263
FGA
SFN
BIK
OVOL1
CCNB2
SLC22A11
TRPM6
HIBADH
S100A1
CAPN9
STON2
TOP2A
ZYG11A
PER3
ZNF614
RAPGEF3
PCDH19
LOC100288637///ARHGAP11B
KRTAP4-8
CRABP2
BCL2L15
PREX2
ASRGL1
KIAA0754
ELK1
CITED4
NUF2
SPX
ESRP1
ASRGL1
ZNF503-AS1
CRACR2B
BTNL8
STC2
ATP10B
USP49
DNAJB13
LOC221122
SALL4
ORAI2
SLC35B3
MCAM
LINC01296///DUXAP10
TACC1
GPM6B
JAG2
SULT1C2
SCGB2A1
TSEN15
HIST2H2AA4///HIST2H2AA3
ATP2B2
SVOPL
EHF
ASXL1
UHRF1
LOC100505498///TEX41
SEMA6C
KDM4C
NOV
LINC00537
TOP2A
TLCD1
ARAP3
C1orf194
CCDC13
HAL
RBM33
GINS4
PTPRT
LOC100996579
SPDL1
NLRP2B
RNF145
GJB1
HAGLROS
DNMT3B
PNO1
SOX21
AIF1L
ERV3-2
SAPCD2
COL12A1
UBE2H
MPZL2
CASR
CNDP2
GDF11
KLK13
TTC39A
FMO2
VWA1
MROH1
FAM90A1
SOWAHA
PIH1D3
GPR158
LINC00320
ZDHHC20
LINC01296///DUXAP10///DUXAP8
GJB3
SLC4A11
FOXM1
TNFAIP8L1
DLGAP5
FEN1
CKS2
MAP9
KRT9
ERVH-6
CCDC88A
CEP97
EIF4E
PAQR4
EVA1A
LOC101929597///TBCD
VWA5B1
PIPOX
CKB
LPAR3
MYB
UGT2B28
OR7E47P
HIST1H2BD
BCL11A
THUMPD3-AS1
LOC728175
LOXL2
NCAPG
NRP2
GJB3
TRY2P
KIF14
LOC100509764///KRT86
KCNMA1
BIRC5
CDS1
SPDEF
LOC100507353///CACNA1A
MKI67
ANP32D
CLDN7
RABL6
LOC105376796
PKHD1
SIX3
NRG2
GLIS1
SFMBT1
TCF19
KIF20A
DEPDC1
LIMS4///LIMS3
PART1
GALNT6
FBXW9
C17orf96
SLC35F6///CENPA
CDH6
UBE2C
C12orf56
CAPN13
LOC153684
LINC01558
PSRC1
MED13
CEP55
SMAGP
HIST2H2BE
ZNF442
MCM10
TMEM92
PLEKHG2
ACOT8
KNSTRN
MREG
FAM69B
LOC151760
FZD10-AS1
SLC5A1
SKA3
SNED1
LOC100509445///LOC728715///OVOS///OVOS2
NAA11
HOMER2
GUCY1B3
PPP4R3B
CDH19
PAX8
PCM1
GPM6B
LOC101929232///PDCD6IPP2
CA8
FAM64A
UGT2B15
RGS1
ADRA2C
SLC6A8
EHF
CACUL1
DHRS13
LOC100507616
CLPB
F12
SLC6A8
SLC7A5
LOC105374676
CEP70
ACKR2
PI3
ANKRD65
MAGEA10-MAGEA5///MAGEA5
GLDN
ITCH
LYPD6B
FLT1
MIR490///LOC349160
PAK3
CLDN16
B3GNT3
PI3
VWF
EHF
KNL1
MNS1
C21orf91
HIST1H2AM
LRRC8B
CBS
NEIL3
KRT6B
PPP1R14C
SPATA2
TCTE3
CD82
C1orf116
PEA15
MYO10
TSPAN12
ATP6V1B1
XDH
CC2D1A
LGALS14
EPHX4
CDK1
PFKP
INA
PROM2
IDH2
MAD2L1
CENPK
DYRK2
CSRNP3
NUSAP1
GDF11
BCL11A
ESRP1
HLA-DOB
RNF144B
LIMK2
AGMAT
MYCL
RNF126
SYNM
MMACHC
CLDN10
MANEAL
CDCA7
ESM1
HIST1H2AE
VGLL1
SLC16A10
GPM6B
COL23A1
PRSS2
SPC24
MAGEA9B///MAGEA9
LOC101929219///LOC100505650///C1orf186
AURKA
TMEM125
SPON1
BUB1
BUB1B
TSPAN10
DCDC2
KRT17///JUP
BCL11A
THBS1
EDN1
BICD1
CX3CL1
LOC100507472///PCSK6
SOX9
MARVELD3
IDH2
CXCL17
CDH6
CENPF
ADCYAP1R1
NEURL1B
FANCI
FZD10
HIST1H2BH
ASH1L-AS1
SYT13
KIF15
NEDD9
MKI67
HMMR
HIST1H2BC
MEX3A
OR7E14P
AFAP1L2
GRAMD2
CHGA
GEN1
RAD51AP1
ESCO2
FOXF2
DUSP10
LOC340340
MELK
MCM2
DEPDC1
KCNH2
TCN1
HTR3A
KIAA0101
FAM174B
SPAG5
LOC101928728
CRTAC1
WDR74
RALYL
GLDC
KAZALD1
SNTB1
TK1
HS6ST1
S100A2
PRC1
TMTC1
DTL
WNT7A
BTBD11
LINC00176
MALL
KIF11
SLC6A8
POLE2
WBSCR22
CX3CL1
MMP7
STON2
EZH2
RAP1GAP
SSX2B///SSX2
SLC5A3
DDIAS
ZNF117
CCL20
HMGA2
ITCH
PATL1
CDC25A
CCL28
MKL2
PGM2L1
TFAP2A
ASPM
ANP32E
FZD10-AS1
LOC101928000
JPH3
TIMELESS
WISP3
HEY2
CASZ1
TSPAN1
CDKN3
CDH6
THEM6
CHODL
C1orf116
IGLJ3///IGLV@///IGLC1
CENPU
MCM4
TMTC1
MIR6741///PYCR2
MFSD3
LRP8
MTFR2
LOC102724312
CDK1
PRIMA1
ARNTL2
PWWP2B
TNNT1
PQLC2L
CDH6
SYT11
LRRC32
EPT1
SLC12A2
KIF23
KRT17///JUP
EDN1
KIF18B
RGS1
TCAM1P
S100A13
FOLH1B///FOLH1
TRIM29
SKAP1
MYBL2
KRT23
GINS1
PRR11
MCM4
TMEM45B
C2orf88
FAM174B
FXYD3
OXTR
PRAME
CXCR4
SLC5A1
AIM2
GUCY1A3
SUSD4
PPIG
PPFIBP1
SLC52A2
PRSS2///PRSS1
GINS2
HELLS
LYPD1
CYYR1
CCNE2
LGR6
UBE2T
DNA2
HRASLS2
NR2F6
CDH6
RNF165
TK1
OIP5
ABHD17C
E2F7
OASL
SFN
KLK8
CCNA2
SLC25A33
E2F8
MACC1
BRIP1
CPM
MTHFD2
DSCC1
INHBB
ASL
WDHD1
FAM171A1
CRTAC1
KIF18A
EPB41L5
HIST1H4H
LOC100507334///LOC100288570///LIMS3-LOC440895///LOC440895
NCAPD2
SOX9
CENPO
KIF1A
FARP1
THSD4
BCAT1
PLK4
THCAT158
CXCR4
BARD1
PTH2R
MAL
MMP12
HIST1H1C
MIS18A
HN1
S1PR3
VTCN1
TMPRSS3
CDK1
FJX1
AOC1
BIRC5
ST6GALNAC1
MCAM
MICALL2
ELAVL4
PLEKHF2
SULT1C2
PHYHIPL
KCCAT333
BBOX1-AS1
SSX2B///SSX2
HIST1H3F///HIST1H3B///HIST1H3H///HIST1H3J///HIST1H3G///HIST1H3I///HIST1H3E///HIST1H3C///HIST1H3D///HIST1H3A
KCNN4
PCDH7
BCL10
COCH
CDKN2A
RARA
SCGB1D2
EIF5B
GPR39
ZBTB42
FLT1
MTHFD2
LOC728485
UNC5A
NGEF
HIST1H2BC///HIST1H2BI///HIST1H2BE///HIST1H2BF///HIST1H2BG
LOC101929368///FKBP1A
S100A14
L1CAM
LEMD1
NPR3
CSPG5
[truncated: 282 more rows]

## Sheet: GSE14407+downregulation
GSE14407
NELL2
LOC101928635///ALDH1A2
TXNIP
ARHGAP18
AQP9
AOX1
PEX5L
ITLN1
DPYD
EFEMP1
METTL7A
REEP1
SLC4A4
MTUS1
MUM1L1
RERG
LOC101930363///LOC101928349///LOC100507387///FAM153C///FAM153A///FAM153B
WNT2B
EMB
GALC
LGALS2
BNC1
FRY
PEX5L
ARHGAP18
HBB
TMOD2
DLG2
LOC101926921///DAB2
CELF2
LOC100506718///FLRT2
EFEMP1
CELF2
NBEA
MMP28
LHX9
CAV1
HBB
DFNA5
SEMA3C
OGN
UBL3
RNASE4
WNT2B
ARHGAP18
SLC4A4
CLIP4
CSGALNACT1
CPE
STK31
ALDH1A3
FGF13
REEP1
GPRASP1
BMP2
SLITRK5
CAST
LGALS8
LIPA
MTUS2
C21orf62
ADH5
C1orf168
CYP39A1
PRG4
PITPNC1
FAM13C
TCEAL7
SBSPON
CPE
GADL1
RORA
SFRP1
MMP28
RAB27B
CHRDL1
PDE7B
SMARCA2
UGP2
GCOM1///POLR2M
N4BP2L2
TFPI
TCF21
LIFR
MIR4454///ABHD12B
ARX
EPB42
ABCA8
TRPA1
HLF
SOSTDC1
CCNDBP1
CCDC28A
DOCK11
CAV2
DIXDC1
PROS1
GHR
SH3GLB1
ANKRD29
DCN
PPM1K
ADH1B
LHX2
TMEM255A
ARRDC4
LOC286191
PPM1E
PCDH17
KCNT2
OGN
GFPT2
VIM
MNDA
ADH1B
KITLG
BCL2
BMP2
SYNE1
PDGFD
CYBRD1
EIF3D
ANXA8L1///ANXA8
ADH1C
SERTM1
C21orf62
PLEKHH2
PKD2
LGALS8
PTPRZ1
SEL1L2
CFAP221
PLCL2
IL6ST
HBB
LIMA1
PGR
BCHE
ZFPM2
AKAP11
PDZD3
LGALS8
GPM6A
TGFBR2
BNC2
HPGD
SGCG
DSC3
MDFIC
CPVL
PCDH17
PDE8B
NDNF
HOXD8
ILDR2
LRP11
PITPNC1
PCM1
CFAP221
SERINC1
HSD17B2
TACC1
MGARP
BNC2
CCDC80
HDDC2
MAGI2-AS3
ANXA4
LGALS3
RSPO1
SLC30A4
ARHGAP28
DMD
IRAK3
ARMCX1
MAF
CAV1
BCAR3
GOLM1
HAND2-AS1
PMP22
SLC46A3
TPD52L1
TXNIP
CELF2
RAB38
SPOCK1
TRIM4
HLF
MAOA
RBPMS
DSE
CRNDE
UFM1
PPM1K
ADGRG6
GULP1
MYZAP
DMRTC1B///DMRTC1
KPNA5
RTN4
NKX3-1
PDLIM3
LRRN4
PHACTR2
ZNF540
MBNL3
PAPSS2
GSTM3
BICC1
GATM
ANKRD29
TFPI2
SNX13
LINC01105
DAPK1
SBSPON
PTGER4
CHGB
CREBRF
KLF10
ESD
HBG2///HBG1
EIF1
ITM2B
JAK1
RERG
LAMP2
MEIS2
HBA2///HBA1
ZNF222
CRLS1
PRKAR2B
NAV3
ARMCX5-GPRASP2///GPRASP2
MEDAG
BNC1
EID1
CAV2
ANKRD12
STK26
SNCA
ATP10D
EIF1
PDLIM5
SLC41A2
CNGB3
VGLL3
CPED1
CXorf57
ADCYAP1
CTNNA3
LXN
EIF1
LRRN4
PLPP1
FYCO1
NBR1
OSTM1
AMIGO2
RARRES1
PLCE1
TCEAL2
FGF9
LOC100507387///FAM153A///FAM153B
HBG2///HBG1
PNRC2
FNDC3A
RBMS3
CLEC4M
LOC101930416///LOC101929792///LOC100996724///PDE4DIP
CHN2
RAB31
PHLPP2
TMX4
HTRA1
MIB1
SEMA6D
DSC3
MAF
TBRG1
CFI
RPRM
CNRIP1
DPY19L3
SNX1
FLRT3
NPY1R
PCNX1
HEBP1
BNC2
LY75-CD302///CD302///LY75
SH3BGRL
BAMBI
PODXL
RGS4
PRKAR1A
MFSD4A
IL18
LINC01133
ANXA4
SDC2
RASSF3
NAP1L3
PLSCR4
PLPP1
GSPT2
JKAMP
UFSP2
PKHD1L1
PDE10A
EZR
WBP4
POLK
MICU3
NR3C1
KPNA5
ANXA1
GABRG1
GAS1RR
ST7L
NR3C2
CAMK2D
ALDH3A2
MIB1
TUSC3
FHL1
CLDN1
MAP1LC3B
MCTP2
OAT
LEPROTL1
FRY
SERPINB9
PPP1R3B
TNFSF13B
BORCS7
OMD
PCDH9
CLDN15
CAB39L
HBG2///HBG1
CYSTM1
SPAG9
PSD3
TAF9B
NIPAL3
PCNX4
HPGD
NDFIP1
MEF2C
SLC31A2
CDKL2
PTGER3
PNMAL1
KCNB1
CPQ
GNAI1
GSTM3
ADGRD1
TACC1
ARFGEF3
CALCOCO2
PQLC3
FAM134B
CRIM1
MGC24103
FAM213A
SLC44A1
ANTXR2
SEMA5A
RTN1
GLS
NDN
TMEM150C
TMEM245
MAGI2-AS3
MET
FAM214A
RBMS3
BNIP2
ST13
STX7
PTP4A1
STAM2
RPL22
OSBPL1A
KAT2B
PCCA
HAND2-AS1
S100A10
HNRNPDL
BBS2
SDPR
PCDH9
SPG20
ACTR10
EEF1A1
LOC101926951///PCDH20
CREBL2
THBD
GATA6
FAM13A
ST3GAL5
SAP18
ALDH1A1
DTNA
CLK1
RNF128
TRPC1
ZNF385B
AKT3
SCARB2
RAB11FIP2
RARRES1
ALG5
ASH2L
SMTNL2
MIR4738///H3F3B///H3F3A
PDE5A
TSPAN13
FABP4
METTL25
CREBRF
HLF
LOC101929500///CRIM1
GULP1
SRI
ATP6V1D
SCD5
CDON
STT3B
RASSF8
OLFML1
TGFBR3
STAMBPL1
TRIM68
FZD7
PGRMC2
KCNT2
BCO2
CALB2
SYBU
LOC100996760
CFL2
NFKB1
TOM1L1
PDK4
B2M
LMBRD1
LOC100506718///FLRT2
PROCR
BTF3
WASF3
NXPH2
MEOX2
TRAK2
FAS
FBXO8
DYNC2H1
HEXB
NMRK1
ARHGAP44
RAB31
FAM114A1
SNORD14D///SNORD14C///HSPA8
ATP6V0E1
SOX6
GAS1
LOC101930400///AKR1C2
PRKAR1A
CREBL2
SEMA5A
MTMR6
PRDM5
ELP2
DDR2
KLHDC1
LINC01105
TUSC3
CFH
TSPYL1
LYPLAL1
MBNL3
CLEC4M
GPALPP1
TSPYL1
SPANXA2///SPANXB1///SPANXC///SPANXA1
UBL3
CRNDE
ASAH1
SOX6
ACAA2
HHIP
HSPA12A
HBA2///HBA1
PLA2G4A
LRP2
AFF1
RNF103-CHMP3///CHMP3
PRRX1
MARCKS
CASD1
DHRS7
CYP2U1
FZD7
ID4
DPP10
MCOLN3
VLDLR
KLF4
LAMA4
ABI3BP
FGF9
FAM134B
ITGAV
DCN
NBEA
OMD
HELQ
SCN3B
CFHR1///CFH
CFDP1
BBS12
ITPR2
FAM65B
NEK9
EZR
PIP5K1B
PURA
ITGB5
AADACL2
GLT8D1
BTG1
SMAD9
C8orf44-SGK3///SGK3
ZDHHC2
IRX3
PITPNC1
CNTN4
CTXN3
CTNNAL1
PNPLA4
INTS6L
NEGR1
ZDHHC2
POLR3GL
AMDHD1
PHLDB2
DST
SNX7
EPS8
TLE4
RABEP1
NAP1L2
LOC101926921///DAB2
NAP1L1
ELAVL2
LINC01105
SH3BP5
ANXA1
SEMA5A
DTWD1
CACNB2
SLC39A8
DSCR3
VGLL3
IFNGR1
SNCAIP
PRRC1
TMEM37
ESD
ITGA2
ANAPC16
KLF9
USP12
GDAP1
PPP6C
TM2D2
CMAHP
ETS2
GCA
CPNE8
NTN4
C2orf40
MYO5B
SPATA7
TM9SF3
SGCE
FAM133A
PIK3C3
ANKMY2
ANOS1
HSPB3
SAP18
NR3C1
KBTBD11
BICDL1
GIPC2
DTWD1
CARNS1
TMEM98
FAM213A
HCFC2
FGF2
RAB31
AP5M1
SNAI2
MSRB2
MET
TFPI2
LOC100507557
EVI5
ANO5
SFRP1
SLITRK5
COL4A6
LEPROT
SNORD83B///SNORD139///RPL3
MTHFD1
SQRDL
DCN
PPM1A
DHFR2
PIGB
COBLL1
CRYZL1
LANCL1
CCDC186
ATF7IP2
SCG5
MSRB3
AKAP7
MCTP2
AKR1C1
PSMA3
CCDC68
FOXO1
FAM110C
LOC145783///ZNF280D
TPBG
TSPAN8
SARAF
ADAMTS18
ATG5
KLF2
LIX1L
PTGER3
PHACTR2
WRB
KIAA0430
SMAD5
PRKACB
COPS4
HPSE
CTSO
CYP3A5
DYNC2LI1
DDX1
PCDH9
NAP1L1
RSBN1
MIR99AHG
VAPA
LINC01116
ASAH1
DENND4C
UAP1
CFL2
SKP1
ECI2
CYP39A1
GATM
N4BP2L2
GCOM1///POLR2M
CLN5
PARP8
ZBTB20
ECM2
CFAP221
LYPLAL1
PNRC1
IFI16
RUFY3
DOCK5
GNG12
CMTR2
MBNL3
SVEP1
DPYSL2
FGL2
MON1B
CYP3A5
SFRP2
SASH1
ZC3H13
KIZ
AZI2
EZR
BCLAF1
LIFR
SOX6
ATP11A
EIF3M
ANXA5
WNT2B
SNORA29///TCP1
INTU
SETDB2
SLC16A1
PROSC
NFIA
NDFIP2
TNFSF13B
LOC101928625///MED21
RAB8B
CRLS1
GABARAPL3///GABARAPL1
NCOA1
FGFR1OP2
DOCK5
SAP30L
SPG20
CACHD1
PSD3
HIVEP3
DNAJB9
ASXL3
CNKSR2
LOC102725213///LOC100507387///FAM153A///FAM153B
RNASEL
FAM13B
SCN4B
ZBTB43
SGMS2
RUNX1T1
ZNF277
CCNI
ATL1
ME1
GKAP1
SATB1
RPL5///SNORD21
MAP3K8
SYNE1
SYPL1
PEX5L
ANXA3
LOC100506548///RPL37
BMPR1A
LOC101930349///LOC101930344///CGNL1
VIPR2
NT5DC1
FAM69A
RCHY1
SLC25A46
CCND2
PRRX1
WNT5A
CMTM4
CALM3///CALM2///CALM1
MMP28
PRSS35
SLC51A
SYNE2
TIMP3
TPBG
AP1S2
ZCCHC14
DOK6
TTLL7
DYNC2H1
PPP4R3B
RPL36A
ARL4A
MINPP1
GATA6-AS1
ADAMTS9-AS2
GNAI1
PBX3
CHST9
SLC17A5
NAP1L5
NSA2
BIVM
FEZ2
PLS3
RNF217
GNG11
KCNJ8
LYSMD3
SLITRK6
TMED10
TAOK3
RAC1
GPALPP1
EIF3M
PAPSS2
H2AFV
SESN1
SCP2
ID2
EFCAB7
ARHGEF10
SLIT2
HOXC6
COG6
SH3GL2
LEPROT
ANKH
ZNF697
PPP3CB
CALCOCO2
ZMYND11
N4BP2L1
SSX2IP
LMAN1
LINC00842
SEC63
RTN4
NUDT6
MAOB
LOC100507577///LONP2
DRAM1
P2RX7
TSHZ3
IFNGR1
IFI16
PYROXD1
GNAQ
KDR
ACAT1
BDH2
FCHO2
KLHL36
PLA2G12A
NAP1L1
CYP3A5
NLGN4X
GPR137B
SATB1
HHIP
ZNF112
MCF2
ECHDC1
SEC62
ERMP1
CAPN2
RNF13
MPHOSPH6
SHPRH
ZNF330
ZNF12
RAB14
SLC16A1
SORBS2
DCUN1D4
CCDC80
CNIH1
ZNF32
RNF146
BDH2
DCN
CEP83
SDC2
SOCS5
ROCK1
FBXO3
RARRES1
UQCRC2
CELF2
LOC101930400///AKR1C2
SRSF11
IQGAP1
TMEM167B
HNRNPH3
TNPO1
CFC1B///CFC1
THAP2
SNCA
LINC01616
CLDN15
CDC40
KATNA1
DMRT2
RFPL1S
EFNB3
VAPA
MCFD2
MFSD4A
HACD1
EAPP
ZDHHC4
SOS2
MORF4L1
PKN2
TTC19
NR0B1
ITPR2
IGIP
BLOC1S6
CLCN3
CAB39
ARPC5
POLI
MIR1182///FAM89A
DNAJB4
PLCE1
ITPR1
DOCK5
USP25
LYSMD2
KLHDC8A
TMEM245
PRKD3
FAM179B
SBSPON
GLIDR
SNORD14D///SNORD14C///HSPA8
EMP1
NSG1
CRYBG3
TET2
WDFY3
PCED1B
VMA21
GLT8D2
MCTP2
PARD3B
DPY19L1
TMCO3
PRR15
SETX
TWSG1
AGTR1
FAT4
LNX2
LOC101928718///FAM212B
DNAJB9
ABCA5
SPRED1
RAB33A
GRIN2A
REV3L
CTR9
C9orf72
TMEM106B
RPL15
OIP5-AS1
SDCBP
L3MBTL3
SMARCE1
TSPAN5
FAM98B
USP53
PAX8-AS1
PALMD
DYX1C1-CCPG1///CCPG1
LOC728392
NEK7
DKFZP586I1420
OGFRL1
AKAP9
CARD16///CASP1
ATF6
BEX1
FAM220A
MGP
FRMD4B
ZNF106
ACOT9
SETSIP///SET
SEL1L
BTD
RALGPS2
OMA1///DAB1
CYS1
PTGIS
FBXO8
PTPN21
RBPMS
GPHN
RDX
IFNAR1
ST13
PCLO
COL3A1
TOB1
ARHGAP32
CCT4
LOC107984282
ARG1
TUSC3
FAM20B
CCDC50
LSAMP
KTN1
VAMP7
SPG11
BST1
CDO1
PCDH17
CUL4B
RGPD6///RGPD8///RGPD3///RGPD4///RGPD5
CANX
TXNIP
RBBP6
ITM2A
SNX3
GIPC2
MDH1
HOOK1
PCGF5
GNA13
FBXL5
TACC1
PTPN13
SLC4A4
DAZAP2
ZDBF2
PPP1R36
NTNG1
STX12
OGFOD1
PRNP
NUDT11
N4BP2L1
PDLIM5
MEF2C
WDR61
KLHL7
DHX15
ARMCX4
TXNL1
LEPROT///LEPR
DNMBP
CACNA2D1
EFNA5
LAMA2
DRAM2
SLC39A8
EEF1A1
RNF130
MPDZ
RCBTB2
AMHR2
GPBP1
RELL1
TOR1AIP1
FGL2
TPD52L1
PSMB1
PCOLCE2
TRIM13
ZFX
GAB1
FGF7P3///FGF7P6///FGF7
TUSC3
RNF13
PLEKHA7
OPTN
ABHD13
JMJD1C
RFESD
ATP6V1D
ATP2C1
SMPD3
PRKAR1A
FERMT1
FAM46A
2022-09-10
PPP4R2
KLHL9
SON
CDH11
EIF3F
PDE1A
SPOPL
PREPL
HSP90AB1
C14orf166
ANO6
ZNF302
SPATS2L
CD164
PIK3IP1
GMFB
TMEM47
TCEA1
MLH1
PTGR1
ATP11C
MIR4738///H3F3B///H3F3A
LOC284578
PAXBP1
OSBPL1A
GRAMD1C
IK
HSD17B11
AKAP12
ISCA1
BTRC
ZNF559
ZDHHC17
RPL3
EIF1B
LEPROT
N4BP2L2
BBS9
CNTNAP4
DOCK4
PIGK
HERPUD1
MIPEP
RPL36AL
MAF
CDC16
REEP5
AGGF1
CDC14A
TMED5
GCNT1
AMZ2P1
KBTBD7
CD200
SGK1
FAM200B
GABARAPL2
TIAM1
CCDC126
IREB2
CNTN1
ASAH1
HTATSF1
ATM
PTPRN2
HACL1
CBLN4
CSDE1
CRYZ
PRKG1
CNTN3
MARCKS
2022-09-08
KLHL31
TVP23B
CALCRL
SOCS6
KIAA0368
LOC101927705///P4HA2
NUDT7
SUB1
RNF180
GOSR1
S100A8
ZNF300P1
CGRRF1
PDZD2
DDX50
RAB30
UBE2I
RNF6
RYR2
NAAA
ATG14
ZNF521
TBX18
CAPN7
PAPOLA
HSPA2
TMEM37
FAM221A
RGS2
IL20RA
MAT2B
CLK4
GOSR1
TBC1D5
CPNE3
GABRA2
SESN3
HPGD
IFT88
MPHOSPH8
TCEAL1
C3
AIMP1
PCM1
PWP1
AGGF1
TPM1
ZNF226
PPM1L
ANAPC16
GALNT10
DHX29
MCOLN2
AQR
RIOK2
ATXN3
LIMA1
UBR2
CIRBP
ISOC1
LPAR5
SNX2
GPM6A
APH1B
PLCG2
PYGL
SOCS5
FERMT1
PPP2CB
AZI2
C6orf120
ZCCHC9
DPY19L2
RAB30
ZBED8
RASSF8-AS1
ARID5B
DOK6
CDK7
YIPF5
SEMA3C
SYT4
NIN
LZIC
LOC101929500///CRIM1
GNPDA2
RPRD2
PIK3C3
AMD1
EZR
SEC62
KLF3
KIF13A
PDPN
SUCLA2
C8orf88
TDRP
VPS13C
FKBP7
ACSL1
BTF3
PHACTR2
NR2F1-AS1
SNHG4///MATR3
CD59
MFF
LRRFIP1
MEF2A
CDC42EP3
ZNF641
ADAM9
RPF1
NAALAD2
C4BPA
BACH1
MRGPRF
MRPS31
SOCS2
HNRNPD
RAB9A
KANSL1L
SEC24B
SIK3
CFAP36
PROSC
MOSPD1
FBXL5
HS6ST2
TBCEL
RICTOR
ARL6IP5
CHIC1
DYNLRB2
XPA
ATG2B
CDC14B
C9orf84
EML1
SPTBN1
CCDC110
SCCPDH
SUPT7L
COPB1
DENND1B
MAGI2
LINC01279
DCBLD2
ARHGAP5
HINT3
SH3RF2
NFE2L2
TMEM87A
YWHAB
NPC2
TBC1D8B
ATXN10
RORA
TMEM50A
MORC3
LRRN4CL
NRXN3
SLC35G2
EFNA5
NEFH
MAGEH1
SOX6
MAGI1
NMNAT3
RGL1
CNOT10
CHD9
IKZF5
ACSL3
NT5E
COBL
RSBN1
PSMC2
FKBP11
SREK1
FAM122A
FBXL3
NKAIN2
MTMR6
MCTP2
SNORD14D///SNORD14C///HSPA8
SLC25A21
CDKN1B
USP47
FRMD6
GABPA
TRIQK
ADAMTS3
ZC3H14
ATL3
KTN1
MAOA
PWWP2A
B3GALT2
TAX1BP1
TIMP1
S100PBP
RBMS1
PARVA
DOCK10
HNRNPM
DENND4C
MORF4L1
SPATA6
NUP37
LRRC49
HNRNPD
CCBE1
NUDT21
TBC1D9
MIR4680///PDCD4
KBTBD6
BEX5
ACSS3
RHOU
FERMT2
FOXP1
HNRNPA0
SNORD83B///SNORD139///RPL3
EIF5
NIPAL3
RRAS2
FAM63B
LOC101926921///DAB2
SCFD1
TTC27
ETF1
TSPAN5
GSTA4
SLC15A4
PIK3C3
SSX2IP
ATP7B
PEX7
CHST9
BNIP3L
RBPJ
RAB29
SWAP70
ZNF615
RNF141
ADPRM
FAM210B
RSPH3
TMEM59
TP53INP1
UTP4
FAM107B
RSL1D1
PDK3
FBXL17
DIRAS3
SMIM15
CACNB2
FAXDC2
SP3
LAMA2
ZNF84
FAM8A1
NRXN3
SULF2
ELOVL7
PPP2R2A
PDE8B
EGLN1
DSTN
DYNC1I2
HDHD2
ODC1
RTF1
IMPDH2
CRB2
PLA2R1
PPP1CB
TBC1D19
LOC100288911
GYG1
SSX2IP
SCYL3
RWDD1
C14orf28
FAM155A
TRPC1
LOC101930115///C16orf52///VWA3A
ADCYAP1
NEFH
QKI
HS6ST2
GNB5
TMED5
PCYOX1
CNOT7
SEL1L2///GPR37
IL16
LIFR
MCC
FAM126A
PAIP2
GFRA1
CLOCK
DYX1C1-CCPG1///CCPG1
TMCC1
MAN1A1
ENPP5
2022-03-06
PEG3
RFXAP
DST
SNORD83B///SNORD139///RPL3
GSTO1
FAM120B
DHX40
SMARCA2
PYURF///PIGY
TBC1D4
NT5DC1
UTP18
PDLIM5
PDZD8
CROT
ARHGEF26
C8orf44-SGK3///SGK3
C4orf3
IPO5
ZC3H14
ARID4A
KIFAP3
TROVE2
USP13
MPL
FER
FAM13A
CNTNAP3B///CNTNAP3
TMX2-CTNND1///CTNND1
PNISR
CMYA5
ERO1B
ZC3H12C
UFM1
RNASE4
SNORD24///SNORD36A///SNORD36B///RPL7A
CACNB2
TGFB2
SGPP1
NR2C1
PTGDR
ZFP36L2
GNB4
USO1
FLRT3
NUDT9
PARM1
GNG12
NFYB
RPL36A-HNRNPH2///HNRNPH2
FAM213A
ARHGAP5
NME7
FOXP1
THUMPD1
SLFN11
C8orf48
RALGAPA1///RALGAPA1P1
RAC1
TMEM123
ST6GAL2
NHSL1
SHISA3
TAX1BP1
PARVA
THAP6
FGFR1OP2
ANG
RBMS1
GALK2
CMBL
ISCU
SEPP1
RSPH3
SNX5
ADGRB3
MAP4K5
NACA
COL6A6
RHOQ
FYN
ARHGAP6
ERC2
EGOT
B3GALT2
MS4A6A
SLC35A5
TMEM87B
WTAP
ZC4H2
CEP126
NAP1L1
EIF5
SUGT1
ZNF24
JKAMP
LOC101926921///DAB2
LATS2
SERAC1
GNB5
PLXDC2
NEBL
VTI1B
SPAG16
PDGFC
CCDC90B
NEDD4L
CDC37L1
CCND2
VPS37A
PLD1
ASXL3
TMEM64
S100A10
ETFBKMT
BZW1
N4BP2L2
CASP4
PPP1R3C
DENND1B
ME1
STXBP3
DNAJC6
PDSS2
NCR3LG1
KBTBD4
HSD17B6
HBA2///HBA1
BEX4
C4B_2///C4B///C4A
TNNI3K
THBD
CNIH4
ERMAP
PDGFRA
TMEM8B
SH3RF2
EZR
PDE8B
PLAGL1
MPP5
FAM171B
REPS2
ETNPPL
ARMC8
WDR61
DSG2
AMZ2
RTN4
FAM63B
FGF1
RNFT1
DST
ITFG1
GNG2
GTF2E2
LINS1
HELQ
PNMA1
PSMA1
UNC50
FAM46A
JMJD1C
RSL24D1
IMPA1
LSM14A
OSTM1
FAXDC2
ZBED5
SNX29P2
RBMS1
ACO2
TDP2
LIMCH1
AK3
ANKHD1-EIF4EBP3///ANKHD1
RTN1
ADO
FGFR1OP2
CDC42EP3
SLMAP
EPHX2
LMBRD2
TTC8
IARS2
DSC3
ZAK
ASNSD1
SBDSP1///SBDS
C11orf58
ZBTB44
LOC105371352
UPF3A
PEX2
AGFG1
HSD17B6
UNC5D
DYNC2LI1
HSPB2-C11orf52///C11orf52///HSPB2
WWC2///CLDN22
RIMS1
OTUD1
SMPDL3A
SIGLEC11
HBA2///HBA1
UACA
FBXO33
FRAS1
PPP2R5E
AKT3
TRIM61
SCOC
MARCO
ASPH
LOC100507477
TPRG1L
RNF11
SHROOM3
GTF2B
BTG1
CCNI
GXYLT2
LONRF2
HAUS1
IDNK
ZCCHC12
CREB3L2
LOC107984534
CHMP4B
LOC101930404///SNORD116-28///SNORD115-26///SNORD115-13///SNORD115-7///SNORD116-22///SNORD116-4///PWARSN///SNORD107///IPW
GABRB1
FAM200B
POLI
RNF103-CHMP3///CHMP3
RCHY1
TAF7
TBC1D15
DGKH
ACSL3
GAS1RR
ADAMTS17
CLIC5
SLK
MED4
LGALS8
ZNF766
SLC9A9
ENPP4
BCL2L13
EBPL
OSBPL6
CPB1
SH3GLB1
CGGBP1
AHNAK
MBNL2
MTSS1
CASC2
AUH
SMAD4
SLC25A21-AS1
NACA
ZC3H14
OCIAD1
RECK
PRKD1
NPTX1
PKP2
EML1
TOB1
PDLIM5
PPP2R5E
ZNF33A
ATMIN
NR2F1
SLC39A10
RAB18
MIR5047///MIR3064///DDX5
TRIM2
DNAJC27
FCMR
SLIT2
RFC1
CASP1
CDC26
STX12
KIAA1109
PSMA1
SLIT2
SLC25A3
STX2
SNX3
TRMT1L
THAP1
C11orf58
HRASLS
KIAA0895
HMGCLL1
PCMT1
KATNAL1
PDGFRL
FGFR1OP2
SIRT1
BLOC1S6
SKIV2L2
AFF3
ARHGEF10
FAM26F
GPR34
IL6ST
ELF1
GLS
SOWAHC
RNF114
TERF2IP
SNX3
MIER3
KATNAL1
OSTC
PGK1
ARL8B
ZFP90
ANTXR1
SMIM7
EMC2
PPID
PRELP
PEX12
CRYZL1
ARNTL
HS3ST1
FBXL4
TRAPPC11
WWC2///CLDN22
PRKAA2
GABRB3
ZNF471
LINC00909
ERICH5
STRBP
2022-09-15
MBLAC2
VAPA
CMAHP
KIDINS220
COL4A5
DPH6
USP47
CBX7
CUL3
SLC16A7
ZNF286B///ZNF286A
ALG9
ARHGAP19
SERPINB9
SLC2A5
SLC44A1
SIPA1L2
ERICH3
C12orf29
UBE2B
USP47
INMT
PAWR
DZIP3
BCLAF1
RBM26
PAPD4
CSDE1
DYNC1I2
MYL12B///MYL12A
GAREM1
TMEM17
PDHB
NFIB
LRRK2
MLLT10
HINT3
WDR7
ABHD13
NR2C2
SNX3
DPYSL3
WASL
TIMM21
REV3L
TRIM6
TXNDC12
SELT
TMEM35B///ZMYM6
PLIN2
SLC30A1
CALD1
JOSD1
GDPD1
RBM26
ELAC1
FOXO1
GABARAPL1
C4orf19
TUG1
CRISPLD1
MMP24
GARNL3
PRKCA
SLC30A7
AASDHPPT
TUBGCP3
RAP2C
GIMAP2
GSAP
SSPN
CAST
RNF38
NAE1
FMN2
CNR1
LINC00667
EIF1AX
PKIA
PSMD10
LAMTOR3
CLDN11
NT5E
KCNJ2
CLMP
ZNF572
USP13
RAB28
YIPF5
IDNK
USPL1
HNRNPK
RABGAP1L
ORMDL1
KIAA1462
BPNT1
RGS4
ANXA2
MICU2
ZNHIT3
LOC100129973
RPRD1A
RABGGTB
NFYB
SERPINI1
ATRX
RDH10
PPP1R3C
EIF5
KLHL13
SMIM20
SLC25A27
DCN
RSRP1
FECH
C11orf1
ENPP5
UFL1
SLC41A2
FAM69A
DPP6
RIF1
IGFBP7
NORAD
SLC2A13
CD109
SGMS1
C7
HEG1
TDRD3
SLC35F5
UBR3
CBX1
PLRG1
PSIP1
ZNF655
PPM1K
FBXO30
HNMT
KLF8
PIAS1
PON3
SOBP
LCA5
LOC400043
PPM1D
AGR2
CCDC50
SAV1
CMAS
UBXN10
KIF1B
LOC100129518///SOD2
TCAIM
ANKRD50
SLC25A43
ST6GALNAC3
RALGPS2
WNT5A
ENDOD1
PJA2
OSGEPL1
RUNDC3B
DNAJC12
SMAD5
TMBIM4
FASTKD2
IPP
LIMCH1
BDKRB1
CELF2
WDR17
APPBP2
SNORD24///SNORD36A///SNORD36B///RPL7A
FABP5
SNORD116-21///SNORD116-20///SNORD116-17///SNORD116-19///SNORD116@
HEATR5A
RAD51C
TCEAL3
ZBTB20
ZNF451
EFHC1
RBM12
DERL2
GNE
SLC1A1
AOX1
DCTD
KCNAB1
ACADM
SKIV2L2
SLAIN2
ARAP2
EIF1
VPS50
LATS1
LRFN5
CCDC50
ZBTB18
MRPL18
WDR44
MIR6125///USP15
SRRD
TLL1
ZNF426
[truncated: 1,423 more rows]

## Sheet: GSE38666+downregulation
GSE38666
NELL2
LOC101928635///ALDH1A2
ARHGAP18
AQP9
ITLN1
REEP1
AOX1
PEX5L
EFEMP1
TXNIP
METTL7A
SLC4A4
MMP28
CELF2
DPYD
PEX5L
EMB
LOC101930363///LOC101928349///LOC100507387///FAM153C///FAM153A///FAM153B
DFNA5
MTUS1
FRY
RERG
MUM1L1
LIPA
LOC101926921///DAB2
BMP2
CLIP4
CPE
STK31
SLC4A4
GALC
DLG2
BNC1
SEMA3C
CAV1
LHX9
LGALS2
DOCK11
ARHGAP18
BMP2
PITPNC1
CAST
PROS1
TMOD2
SBSPON
CHRDL1
HBB
UBL3
MMP28
TRPA1
UGP2
ADH1B
CELF2
EFEMP1
N4BP2L2
RAB27B
ADH5
ADH1B
CYBRD1
CCDC28A
GHR
LGALS8
FGF13
LHX2
SERTM1
REEP1
RORA
CSGALNACT1
CPE
MIR4454///ABHD12B
PDE7B
HBB
LGALS8
SGCG
EPB42
CAV2
BCHE
CYP39A1
DSC3
EIF3D
DIXDC1
PRG4
LOC286191
LRRN4
LOC100506718///FLRT2
CCNDBP1
PITPNC1
C1orf168
ANXA4
VIM
TXNIP
HSD17B2
PDGFD
RBPMS
DCN
CAV1
ARHGAP18
WNT2B
LGALS8
C21orf62
MDFIC
PDLIM3
CPVL
PCDH17
SFRP1
SERINC1
RSPO1
OGN
RTN4
TMEM255A
NBEA
ADH1C
KPNA5
HDDC2
EIF1
SEL1L2
CCDC80
RNASE4
SNCA
LXN
GCOM1///POLR2M
SH3GLB1
RARRES1
IL6ST
OGN
PCDH17
ZFPM2
FLRT3
GADL1
EIF1
KCNT2
MAF
LIFR
PPM1K
AKAP11
SYNE1
BNC2
EIF1
LRRN4
UFM1
KITLG
LAMP2
TPD52L1
PLEKHH2
ANKRD29
TFPI
PPM1K
GULP1
DSE
PKD2
PDZD3
DSC3
CHN2
MBNL3
TFPI2
HBG2///HBG1
C21orf62
RERG
STK26
MYZAP
PLSCR4
PLPP1
FAM13C
ARRDC4
PLCL2
TMX4
TACC1
WNT2B
CLDN1
FNDC3A
RAB31
LIMA1
HBB
BNC2
ABCA8
PMP22
ALDH1A3
TGFBR2
CXorf57
MIB1
DAPK1
ANKRD29
HAND2-AS1
RAB38
PTGER4
SBSPON
PDE8B
PNRC2
LOC101930416///LOC101929792///LOC100996724///PDE4DIP
ADCYAP1
BCAR3
PLCE1
SLC30A4
ANKRD12
TCEAL7
PHACTR2
ALDH3A2
CAV2
HBG2///HBG1
PGR
SMARCA2
CLDN15
ESD
PAPSS2
MTUS2
GPRASP1
GPM6A
CYSTM1
TRIM4
TMEM245
ZNF540
PCNX1
FYCO1
NAV3
KPNA5
TBRG1
OSTM1
UFSP2
DMD
PTPRZ1
MET
CNGB3
PRKAR2B
ARHGAP44
NPY1R
ANXA8L1///ANXA8
SLC31A2
PNMAL1
FHL1
PCM1
CFAP221
CELF2
CFI
IRAK3
ARMCX1
CRNDE
GLS
ARX
DMRTC1B///DMRTC1
MNDA
OSBPL1A
PDLIM5
ATP10D
RGS4
PODXL
TCEAL2
CAMK2D
S100A10
BNC2
PLPP1
ANXA4
IL18
SEMA6D
PTP4A1
PRKAR1A
ST13
JAK1
HBG2///HBG1
ILDR2
EEF1A1
TNFSF13B
DTNA
GFPT2
ELP2
PHLPP2
ITM2B
SDPR
CREBL2
SCD5
ALG5
HEBP1
MFSD4A
CNTN4
POLK
SCARB2
GAS1
B2M
TRAK2
GNAI1
FAM213A
RARRES1
MIB1
MGARP
SPOCK1
LOC101929500///CRIM1
HOXD8
PPM1E
GAS1RR
NBR1
HLF
CTNNA3
OMD
SNX1
TAF9B
NDNF
MCTP2
LINC01105
MAF
JKAMP
KLF10
AKT3
RAB11FIP2
SEMA5A
MAGI2-AS3
CNRIP1
CFAP221
SH3BGRL
EZR
LAMA4
NKX3-1
RNF103-CHMP3///CHMP3
MGC24103
PGRMC2
BICC1
C8orf44-SGK3///SGK3
TUSC3
TGFBR3
ELAVL2
CAB39L
STX7
PCDH9
ATP6V0E1
BORCS7
AMIGO2
EID1
BBS2
SNX13
SH3BP5
SOSTDC1
HNRNPDL
NDFIP1
FRY
BTF3
NFKB1
SLITRK5
PCDH9
RNF128
PSD3
BCL2
SCN3B
GOLM1
MICU3
MEF2C
MAGI2-AS3
PPP6C
PROCR
ZDHHC2
SPAG9
CDKL2
BBS12
NMRK1
DTWD1
METTL25
RUFY3
GULP1
RTN1
ANXA1
FAM13A
LOC101930400///AKR1C2
STAM2
TACC1
CREBRF
HPGD
ASH2L
SLC41A2
MEOX2
CNKSR2
GPALPP1
MAOA
PDE10A
BNIP2
SNCAIP
ANAPC16
CRIM1
SNORD14D///SNORD14C///HSPA8
ACAA2
MEDAG
PTGER3
CFL2
SLC39A8
HHIP
LOC100507387///FAM153A///FAM153B
NAP1L3
GSTM3
CALCOCO2
LEPROTL1
ITPR2
TSPAN13
NXPH2
RABEP1
LRP11
TFPI2
SLC46A3
RBMS3
SGCE
ARHGAP28
DHRS7
PEX5L
LMBRD1
KLHDC1
FAS
CLEC4M
HPGD
ZDHHC2
HLF
HAND2-AS1
TSPYL1
PCCA
TOM1L1
KCNT2
ANXA5
FBXO8
CHGB
CYP2U1
PHLDB2
GCA
ANXA1
CFL2
ARFGEF3
WBP4
PIK3C3
ETS2
RASSF3
SOX6
ANKMY2
CMAHP
N4BP2L1
NEGR1
ESD
UBL3
RAB31
SVEP1
LANCL1
ITGA2
BNC1
NT5DC1
SYNE1
RAB31
ARMCX5-GPRASP2///GPRASP2
AFF1
KCNB1
HPSE
PRDM5
SNCA
TM9SF3
HBA2///HBA1
NR3C2
PITPNC1
FGL2
SEMA5A
ID4
CREBL2
ST3GAL5
PCDH9
ACTR10
DST
FOXO1
TPBG
TIMP3
GKAP1
SNORD83B///SNORD139///RPL3
ATG5
RBMS3
MBNL3
PPM1A
ECHDC1
NDN
NR3C1
MAP1LC3B
CTSO
DPY19L3
PHACTR2
GATA6
SYBU
PNRC1
MET
N4BP2L2
LY75-CD302///CD302///LY75
GSPT2
BTG1
INTU
CREBRF
MEIS2
LYPLAL1
GPALPP1
SKP1
HBA2///HBA1
GATM
LOC100506548///RPL37
CACNB2
IFNGR1
ANTXR2
CLDN15
PAX8-AS1
IFNGR1
RNF13
TLE4
LINC01133
POLR3GL
C2orf40
TNFSF13B
ANXA3
NBEA
RASSF8
ECI2
NAP1L2
CRYZL1
LGALS3
BDH2
USP12
HLF
HTRA1
BAMBI
DDR2
MYO5B
SOCS5
SNORA29///TCP1
CPQ
MIR4738///H3F3B///H3F3A
RNASEL
ANOS1
RPL5///SNORD21
PURA
PLA2G12A
DOK6
SMAD9
GABARAPL3///GABARAPL1
THAP2
SH3GL2
MSRB3
PPP1R3B
SMAD5
CRNDE
SATB1
LOC101926951///PCDH20
CHST9
EIF3M
ZBTB20
ITGB5
MTHFD1
CRLS1
ABI3BP
TRIM68
PRKAR1A
RPL22
DPP10
ZNF330
FABP4
PCNX4
PPP4R3B
DKFZP586I1420
LYPLAL1
KTN1
PKN2
CAPN2
PRKACB
GABRG1
ATF6
FAM114A1
SAP18
TTLL7
SCG5
GLIDR
OAT
NFIA
SYPL1
EZR
PSMA3
CPED1
RARRES1
MBNL3
ATF7IP2
WRB
CTNNAL1
FEZ2
SQRDL
ZNF385B
TMEM245
IQGAP1
FBXO3
PRRX1
SGMS2
HSPA12A
SFRP2
LINC01105
SCN4B
ITGAV
SDC2
EZR
LOC101926921///DAB2
SCP2
LOC100507557
SATB1
COL4A6
LINC01116
DHFR2
ARPC5
PIGB
KIZ
PARP8
PDE5A
BST1
CYP3A5
KAT2B
MCTP2
COPS4
FAM65B
CFDP1
PRRX1
CFHR1///CFH
COBLL1
UQCRC2
RNF146
DCN
IFI16
SLC44A1
IRX3
ZBTB43
CELF2
POLI
TM2D2
ECM2
KLF2
MCOLN3
NEK7
SESN1
PRRC1
DTWD1
CYP3A5
ASAH1
CAB39
KLF4
PALMD
ARHGEF10
TXNL1
FAM214A
MSRB2
ZNF222
FAM134B
ASAH1
CFH
RUNX1T1
GCOM1///POLR2M
PCDH17
TXNIP
KLF9
CCDC186
ZNF32
VLDLR
EEF1A1
MMP28
TMEM98
TMEM150C
SNX7
DNAJB9
CACNA2D1
NR3C1
CDON
RSBN1
DCN
PNPLA4
LEPROT
SPG20
FGF2
SPOPL
GDAP1
LYSMD2
SARAF
KCNJ8
EIF3F
CRLS1
HSD17B11
VGLL3
FAM110C
GPBP1
HELQ
SNAI2
DCUN1D4
PTGER3
LIFR
DOCK5
ROCK1
LOC101930400///AKR1C2
ALDH1A1
MTMR6
N4BP2L1
C14orf166
DPYSL2
AADACL2
SPG20
CALCRL
LOC100507577///LONP2
ZNF277
PYROXD1
AZI2
ATP6V1D
GSTM3
SORBS2
FAM13B
SETDB2
PKHD1L1
TRPC1
NAP1L1
ST7L
CCT4
HEXB
UAP1
RPRM
SOS2
RCHY1
EIF3M
TIAM1
RPL36A
SLC17A5
CLK1
CFAP221
LIX1L
ASXL3
MARCKS
PAPSS2
OLFML1
SLC16A1
STAMBPL1
INTS6L
EFCAB7
NDFIP2
ZMYND11
SEC24B
FRMD4B
RNF13
VAMP7
TAOK3
RBPMS
SEC62
DYNC2H1
MAP3K8
TUSC3
KLHL36
MCOLN2
JMJD1C
TPBG
NSG1
CTR9
HACL1
PSMB1
VGLL3
GNG11
GIPC2
CYP3A5
FCHO2
CDC14A
ITM2A
LOC102725213///LOC100507387///FAM153A///FAM153B
AP5M1
AKAP9
EVI5
CHST9
TSHZ3
USP25
RNF217
FBXL5
ADGRG6
DYNC2LI1
RDX
ZNF226
FAM134B
CDC40
RPL3
NSA2
CASD1
TCF21
FAM221A
PBX3
SPANXA2///SPANXB1///SPANXC///SPANXA1
RELL1
AQR
BCLAF1
SEMA5A
SRI
GYG1
CGRRF1
HOXC6
EFNB3
PARD3B
STT3B
OPTN
VAPA
SASH1
MGP
ARL4A
HHIP
DOCK5
RPL15
ATP11C
BIVM
LOC145783///ZNF280D
SLC25A46
HSP90AB1
SBSPON
TMED5
SMARCE1
LOC101929500///CRIM1
CDC14B
C8orf88
DYNC2H1
GABARAPL2
GMFB
ATL1
ARHGAP32
BTD
TAX1BP1
SDC2
ATM
SPATS2L
SNORD24///SNORD36A///SNORD36B///RPL7A
NAP1L1
CYS1
BTF3
CD164
HPGD
SETSIP///SET
ADAMTS18
RBPJ
TMEM167B
MEF2C
SEC63
BCO2
DOCK4
CCDC110
AP1S2
GRAMD1C
PLA2G4A
ZNF112
IFI16
RPL36AL
MCTP2
CMTR2
CLN5
MPHOSPH8
MPHOSPH6
RTN4
RAB33A
SPATA7
PIP5K1B
MON1B
LINC01105
CARD16///CASP1
COL3A1
TMED10
RCBTB2
CLEC4M
L3MBTL3
SOCS5
NTNG1
RBBP6
OMA1///DAB1
EZR
CNIH1
PROSC
USP53
RAB14
ZNF697
TTC19
TMCO3
FGF7P3///FGF7P6///FGF7
CALCOCO2
COPB1
HNRNPD
MIR99AHG
FAM46A
BICDL1
OIP5-AS1
HERPUD1
FKBP11
NAP1L1
LOC100996760
MIR4738///H3F3B///H3F3A
ABHD13
DENND1B
GNB4
HACD1
TWSG1
ZC3H13
RPRD2
TOB1
DRAM2
FAM133A
KIAA0430
DENND4C
TTC27
RBMS1
PTGR1
GNG12
IFT88
HNRNPH3
FGFR1OP2
XPA
GOSR1
ANO5
SAP18
MAGI2
CCDC68
PRSS35
NTN4
MORF4L1
FAM63B
SNORD83B///SNORD139///RPL3
PAXBP1
IK
NAP1L5
GRIN2A
PIK3IP1
NAAA
REEP5
PROSC
P2RX7
2022-03-06
LIMA1
NFE2L2
DDX1
TSPYL1
RNF130
RYR2
WNT2B
DNAJB4
SLIT2
NCOA1
RAB9A
FZD7
OGFRL1
SPG11
RNASE4
FZD7
CCNI
DENND4C
RAB8B
DHX15
ANO6
GPR137B
DENND1B
TMEM8B
MRPS31
KLHL31
LRRFIP1
TPM1
CD59
FBXO8
THUMPD1
CCDC50
OSBPL1A
ACAT1
PWP1
FGF9
MLH1
TET2
THBD
WDR61
SNORD83B///SNORD139///RPL3
AMDHD1
MDH1
NEK9
LYSMD3
GCNT1
HCFC2
TDP2
NUDT6
PIK3C3
ANAPC16
BACH1
CNTN3
ACOT9
DPY19L1
ATL3
ZNF302
CNOT10
RICTOR
ME1
EPS8
PDZD2
TAX1BP1
EIF1B
ZNF24
PLCG2
IGIP
TBC1D9
KLHL7
CARNS1
BLOC1S6
SAP30L
CPNE3
CNTNAP4
LOC101926921///DAB2
GLT8D2
MCFD2
SUPT7L
BTG1
CASP4
H2AFV
LNX2
CCNI
MAT2B
EAPP
HINT3
SOX6
PLCE1
FCMR
C4orf3
VIPR2
AIMP1
SFRP1
CPNE8
RSPH3
EFNA5
ST13
UBXN10
MPDZ
SETX
FERMT2
TCEAL1
ENPP5
ADAMTS9-AS2
TOR1AIP1
ERMP1
PRKCA
SRSF11
ARMCX4
GOSR1
LEPROT
ASAH1
SDCBP
KBTBD7
ZC3H14
PAIP2
2022-09-10
PRKD3
YWHAB
FAM200B
FGL2
MAOB
RORA
ZCCHC9
IL16
IREB2
DCN
FAM20B
SON
DSCR3
CSDE1
PDK4
VAPA
FAM8A1
OGFOD1
SERPINB9
N4BP2L2
IKZF5
SLC35A5
SLITRK6
ARHGEF26
C11orf58
PQLC3
FGFR1OP2
EIF5
CDC26
NIPAL3
SIK3
ATP2C1
TSPAN5
FGFR1OP2
PWWP2A
BDH2
PDK3
RGS2
MAGI1
PYURF///PIGY
FAM26F
PLS3
AMZ2P1
OMD
USP47
GIPC2
MFF
CDC16
C3
GATA6-AS1
SMTNL2
CCND2
CMTM4
CCDC80
YIPF5
TMEM59
FAM213A
CLCN3
TPD52L1
S100A8
CROT
AGFG1
SNORD14D///SNORD14C///HSPA8
TPRG1L
FRMD6
PDE8B
PCLO
RNF6
DDX50
RALGPS2
PPM1L
PCED1B
MIR1182///FAM89A
TMEM106B
IKBKAP
GFRA1
RSL1D1
PTPN21
RTCB
GSTO1
FAM210B
SLC51A
CLOCK
ANKH
SHPRH
CGGBP1
DYNC1I2
HDHD2
OSTC
HAUS1
CCDC90B
PSD3
AKR1C1
QKI
TP53INP1
PARVA
MRGPRF
LOC107984282
DHX40
AMZ2
ARID5B
NEDD4L
TMX2-CTNND1///CTNND1
SUCLA2
C4BPA
GABRB3
CRYBG3
TBC1D8B
PREPL
EIF5
SLK
SNHG4///MATR3
KIAA1109
CALM3///CALM2///CALM1
TUSC3
SUB1
CALB2
WDFY3
PDLIM5
LSAMP
NME7
HNRNPM
WNT5A
C9orf72
PPP1R36
PCGF5
RGPD6///RGPD8///RGPD3///RGPD4///RGPD5
DRAM1
LEPROT
GABPA
LOC101927705///P4HA2
MEF2A
SBDSP1///SBDS
GLT8D1
CRYZ
ATXN3
FAM179B
SLMAP
SLC39A10
NT5E
UBR2
SLC16A1
FAM122A
SPTBN1
AHNAK
EFNA5
KLHL9
NIPAL3
LOC101928625///MED21
MORC3
GALK2
ISOC1
ID2
LOC101930349///LOC101930344///CGNL1
KBTBD11
ETF1
MFSD4A
PDGFC
SHROOM3
PCOLCE2
TNPO1
FAM98B
ACSS3
EIF1
RHOU
LOC101926921///DAB2
CASP1
LINC00667
TAF7
SNORD14D///SNORD14C///HSPA8
PEX2
REV3L
PSMA1
ZC3H14
CEP83
S100A10
PSMC2
TVP23B
MINPP1
HSBP1
GNG12
LOC101928718///FAM212B
DNAJB9
ADAMTS3
PRKAR1A
FGF9
CFAP36
CBLN4
CDK7
RBMS1
USP47
INMT
PPP3CB
KATNA1
NT5DC1
DAZAP2
FAM220A
UBE2I
WASF3
LATS2
PPM1D
S100PBP
C8orf48
SCOC
NACA
ACO2
RSPH3
PTGIS
SCFD1
PRKG1
SEC62
RAC1
ATP11A
STRBP
PDHB
ASPH
ETNPPL
FAXDC2
AZI2
LAMA2
FAM213A
RGL1
SNX2
DSG2
GPNMB
UACA
ADO
2022-09-08
CREB3L2
NIN
FAM200B
BBS4
KDR
ZNF12
TDRP
SMIM7
LINS1
HNRNPD
ZFP36L2
KLHDC2
CDO1
UTP18
PTPRN2
C12orf29
DYNLRB2
ZFX
CLMP
MYL12B///MYL12A
MRPS14
HSPA2
IFNAR1
SNORD24///SNORD36A///SNORD36B///RPL7A
HOOK1
TGFB2
ZBED8
ZBTB20
CFC1B///CFC1
TMEM50A
FAM63B
ADGRD1
N4BP2L2
MBNL2
FAM69A
CYP39A1
GAB1
DST
PPP1R3C
GNA13
USO1
LINC01279
ZNF426
EGLN1
ARHGAP19
GRSF1
HTATSF1
SMPD3
ACSL1
ENDOD1
CLK4
SNX3
STX12
HNRNPA0
FRA10AC1
TBCEL
C14orf28
SUGT1
CIRBP
PDLIM5
RBMS1
NT5E
PRNP
ARHGEF10
MIR4680///PDCD4
NEBL
DSC3
PPID
PDE1A
PPP2R2A
SLC25A21
MS4A6A
SEMA3C
GTF2B
PTPN13
STXBP3
ZNF106
PGK1
RAD51C
CBX1
CD59
RNF103-CHMP3///CHMP3
COBL
LOC284578
ZNF559
GARNL3
TMEM87A
EIF1AX
NACA
WDR61
TRAPPC11
TROVE2
STX2
APPBP2
ATP5A1
CD46
MCTP2
GALNT10
IGFBP7
TRIQK
IDNK
MPP5
PNISR
IMPA1
CSDE1
NCR3LG1
KTN1
TMEM37
ZNF641
TEFM
SH3RF2
AMD1
PPP1CB
LRP2
POLI
DPY19L2
SYT4
AGGF1
ATG2B
CTXN3
PNMA1
FBXL17
ME1
ASF1A
NR2C1
LOC100507477
FGFR1OP2
LOC100506718///FLRT2
WTAP
FAM155A
CCDC50
CDKN1B
TLR3
SCYL3
FBXL3
BEX4
CEP126
RRAS2
SRRD
VPS37A
SOCS6
IMPDH2
CAST
RSRP1
CACHD1
2022-09-15
SMIM15
MIR5047///MIR3064///DDX5
TIMP1
SNX3
USP16
ARL6IP5
AFF4
WWC2///CLDN22
PPP4R2
KLHL11
CMAHP
BMPR1A
CUL4B
PPP2R5E
TRIM61
AAED1
EZR
FRAS1
PLXDC2
CHIC1
SCCPDH
HERPUD2
NUDT7
MRPL18
MAOA
AKT3
CEP112
IARS2
C8orf44-SGK3///SGK3
HMGCLL1
AUH
FOXP1
GNPDA2
SH3GLB1
SLC25A27
ARL6IP5
LPAR5
OSBPL8
DSTN
RNF11
AK3
JKAMP
BBS9
ANXA2
ASNSD1
GSPT1
TTC3P1///TTC3
SAV1
RTN1
RTN4
CREB1
ISCU
SLC44A1
DAAM1
SOX6
PAPD4
DOCK5
CPM
ZNF33A
EBLN2
SIGLEC11
DPP8
NAP1L1
MAP4K5
RAC1
GLS
TMED5
PSMA1
SSX2IP
GIMAP2
NR2F1-AS1
IL6ST
ZNF638
GNAQ
OCIAD1
EIF5
DECR1
CCSER2
AKAP7
HMGN4
SNX3
TRPC1
LOC101930115///C16orf52///VWA3A
LAMTOR3
UBE2B
C1RL
FECH
KIF5B
PUM2
ZNF397
TRMT1L
SPATA6
MED13
CDC37L1
TFPI
ISCA1
MARCKS
IFT74
NUDT6
SP3
ARG1
FOXP1
DOK6
YIPF5
WDFY3-AS2
SLC16A7
FBXO28
ATP5L
FER
SLC30A7
STX12
C4B_2///C4B///C4A
RNFT1
KCTD6
SLC15A4
PCM1
MAN1A1
RAB29
ZNF638-IT1///ZNF638
USP13
LINC01616
SETSIP///SET
ADCYAP1
RIMS1
TANK
SEL1L
DST
TTC8
RAB30
RSL24D1
TMEM35B///ZMYM6
ODF2L
COQ7
GPR75-ASB3///ASB3
MPHOSPH8
LINC00473
CNR1
LSM14A
ENPP5
IPO5
AIDA
NR2C2
ANKRD50
ZFP90
ZNHIT3
ERO1B
CELF2
CNOT7
TUG1
LEPROT///LEPR
RASSF8-AS1
PLCB1
RFESD
ODC1
SETD7
TBC1D1
TMEM70
MIR6125///USP15
TMEM47
SOX6
LOC100288911
SELT
IL20RA
PIGK
SLITRK5
LOC101928826///TPT1
UBE2D3
SVIP
CLOCK
SMAD4
ACSL3
BTRC
PIAS1
LIMCH1
TRMT11
PSMA1
FOXO3
CALD1
RUNDC3B
KRT19
CDH11
GAB1
SMIM20
VTI1B
BCLAF1
SSPN
BEX1
FOXO1
SKIV2L2
SWAP70
JMJD1C
PIK3C2A
SYNJ2BP-COX16///SYNJ2BP
USP16
CCDC50
DYNC1I2
BNIP3L
MAGI2-AS3
GNAI1
LONRF2
DDX17
GABARAPL1
DYX1C1-CCPG1///CCPG1
PPP2CB
TMEM30A
MTMR6
UNC50
FAM107B
TNNI3K
ZDHHC4
FUCA1
GNB5
ELOVL7
PJA2
CDC42EP3
RIOK2
DHX29
HSPB3
ZDHHC17
TLL1
SLC44A1
ZNF521
THAP6
DSTN
SKAP2
ANKHD1-EIF4EBP3///ANKHD1
EPHX2
EFHC1
NPM1
KBTBD6
KIAA1033
NPC2
TACC1
KIF13A
INTS10
DPH3
TMEM123
DNAJC8
KLF9
DCBLD2
ARID4A
NEFH
NUDT9
PARD6B
ZBED5
RABGAP1L
PKP2
GTF2E2
PSMC2
SMARCE1
ALG9
C11orf1
LCA5
TMBIM4
HNRNPK
SYNE2
LINC00909
GAS1RR
TFPI
NAPEPLD
C11orf58
RNF38
OXCT1
ARPC2
FERMT1
CALD1
CCDC25
LOC107984534
FAM171B
TBX18
FMN2
RPS6
FAM120B
MICU2
PON2
PDSS2
LINC00842
ZNF655
ZNF33B
CDC42EP3
UFL1
AGTR1
TMEM50A
LMBRD2
FEZ2
RTF1
PNISR
ENPP4
RFPL1S
ARL14EP
VAPA
FKBP7
HBS1L
WASL
SHISA3
PCYOX1
SMARCAD1
LOC728392
SERPINI1
NRXN3
MIPEP
TUSC3
IPP
ERC2
SMARCA2
KLHDC8A
LIFR
SLU7
LRRC49
IQCA1
SGMS1
PDE8B
ELAC1
ARMC8
RAB28
CAPS2
STXBP1
SLC30A1
GDPD1
SEPP1
CASP1
UTRN
LOC283788
ETFBKMT
ZNF45
MYSM1
MTO1
TFRC
MED4
RRAGA
SRI
RBL2
GNB5
TUBAL3
ATP6V1D
ADPRM
ADAM9
LOC100129518///SOD2
SPRED1
ARHGAP5
TRIM6
CLIC5
TMBIM4
RBM26
GATM
GSAP
SNX29P2
RBM12
SDAD1
NFIB
PHKB
SPAG16
SLC35G2
USP53
CUL3
FAT4
TCEA3
MIR4680///PDCD4
TIMM21
PRPF40A
ZNF451
TOMM20
SNORD73A///RPS3A
CDC73
USP47
VPS13C
MGEA5
RAB22A
RPRD1A
ABCA5
MRPL19
KIDINS220
ITPR1
RABGAP1L
C6orf120
EFCAB6
KCNRG
DCTD
SLC4A4
REPS2
C10orf54
HNMT
CHD9
MAGEH1
ARHGAP5
PLRG1
USPL1
SNX3
KANSL1L
SSR1
SMAD5
FBXL5
TMEM87B
KLF3
KIAA0226L
UBQLN1
TSPAN5
WWC2///CLDN22
PPWD1
ZNF658
OSBPL6
EID1
HNRNPA3
GNG2
AGGF1
SCARB2
PTGDR
LMAN1
CMYA5
KIAA1958
FASTKD2
ZC3H12C
RCHY1
RNF114
IL6ST
UBE2B
FAM46A
C15orf57
SOBP
MCF2
SCAMP1
NKAIN2
NUP37
PKIA
TBC1D4
LITAF
MMADHC
SYT1
MAP4K3
ZNF148
SLC25A3
RAB27A
FYN
PPA2
UNC5D
ADGRB3
GALNT12
ZNF395
NOL7
LAMTOR3
ZNF471
COL4A5
RABGGTB
MYO5A
C1QTNF3-AMACR///AMACR
SREK1IP1
DYNLT1
TCEAL3
RWDD1
ZNF25
CHD9
IL1R1
AASDHPPT
LZTFL1
RPF1
ERCC5
HSD17B6
SLC39A6
NPHP3
AKAP12
THYN1
ZAK
ZNF281
TMOD1
MAPK1
PRKD1
UTP23
HEATR5A
TMEM17
UPF3A
ANXA2
HPF1
KDELR3
FAM76A
SLC35E2B///SLC35E2
PSIP1
ZNF211
SERPINB1
IFFO1
PEX7
EMC2
HSPB2-C11orf52///C11orf52///HSPB2
CAPN7
RPL6
GJA1
TERF2IP
FAS
FAM92A1
LOC100129406
CNST
CLSTN2
SLC39A8
IDI1
NUDT3
MTO1
ITFG1
TMLHE
UIMC1
COLEC12
ZBTB21
ELF1
SPRY1
FLRT3
EID1
ACADM
ZCCHC14
DYNC2LI1
ASXL3
LOC400043
ATP7B
PLEKHA1
IDI1
DZIP3
IPO11-LRRC70///IPO11
CNTNAP3B///CNTNAP3
BBX
RSPRY1
WDR44
DMRT2
PHIP
ST6GAL2
NRXN3
CLDN12
SH3GLB1
SYNPO2
PEX12
SLAIN2
HNRNPDL
TROVE2
PHLDB2
CALML4
FBXL4
ARAP2
EML1
ORMDL1
TMX3
NSRP1
RAB18
PTHLH
GAREM1
CETN2
CHMP2B
ZNF806///ZNF285
GATAD1
OTUD1
USP8
TRIM13
KRR1
SGPP1
DPYSL3
KCTD3
CREBRF
PSMD12
SNORD18C///SNORD18B///SNORD18A///SNORD16///RPL4
CACNB2
ATG3
SMIM14
MCC
BLOC1S6
RAP2C
SNORD18C///SNORD18B///SNORD18A///SNORD16///RPL4
DYNLT3
ERICH3
FGF1
UFM1
CD109
SOCS2
CREBRF
C4orf32
MTSS1
ANXA2
TRIM2
COL6A6
ZNF300P1
NR2C1
TSPAN8
FSTL1
PDS5B
PYGL
SPRR3
DOCK7
C4orf19
ATRX
LZIC
SNRPE
EFL1
ID4
DIRAS3
AFF3
NF1P9///NF1
B3GALT2
[truncated: 1,829 more rows]

## Sheet: GSE40595+downregulation
GSE40595
ITLN1
LINC01105
LINC01105
ABCA8
BCHE
NPY1R
CACNB2
MAF
CLDN15
HAND2-AS1
SMPD3
CLDN15
TMEM37
MEDAG
RNASE4
ADH1B
PEX5L
LHX9
ADH1B
GPRASP1
INMT
MGARP
HBB
GHR
OLFML1
AGTR1
C21orf62
CALB2
DAPK1-IT1
LYRM9
PTGDR
LINC01105
AOX1
SLC4A4
REEP1
TNXB///TNXA
PDGFD
HBB
PDE8B
ANXA8L1///ANXA8
PLEKHH2
PLPP1
LRRN4
CELF2
PRG4
UBE2D3
ARMCX4
LGALS2
FGF1
HBB
TNXB///TNXA
LOC286191
DIRAS3
CNIH4
LRRN4
MMP28
NKX3-1
PHLPP2
LOC100506718///FLRT2
TNXB///TNXA
MMP28
TCEAL2
CRLS1
ADGRD1
LRCH3
TRIM13
MTUS2
TCF21
PTGIS
C1S
PROCR
DAPK1
PODN
CHD9
AKAP11
HBA2///HBA1
TSPAN5
ARHGAP18
BMP2
MUM1L1
MAOA
MAP3K8
OGN
CDON
ALDH1A1
HAND2-AS1
CXorf57
BNC2
DFNA5
MAF
GFPT2
CALD1
NBR1
TXNL1
SPOCK1
PDLIM5
PPP1R12B
PCMTD2
HBA2///HBA1
ARHGEF7
MNDA
PPM1K
ELAVL2
PRKAR1A
TCEAL7
TNXB///TNXA
SVEP1
LOC101930349///LOC101930344///CGNL1
HBA2///HBA1
MED6
REEP1
LSAMP
LOC101926951///PCDH20
MED13L
AFF4
U2AF1
CALD1
HBA2///HBA1
HBA2///HBA1
DOCK11
ARHGAP18
SLC16A1-AS1
NPTN-IT1
LOC101926921///DAB2
SFXN3
WNT2B
GADL1
MAGI2-AS3
LOC101928635///ALDH1A2
ZNF641
ADH1C
PKD2
LOC101926921///DAB2
LOC100506718///FLRT2
KIAA0754
SMAD4
TSPAN5
CCDC80
LOC101926921///DAB2
HSD17B6
MCTP2
YPEL2
LOC100507387///FAM153A///FAM153B
ADCYAP1
KDR
SNCA
ARHGAP6
SIRPA
RAB12
NUMB
EPB42
ARHGEF10
ST3GAL5
WSB1
BNC1
BMP2
SEBOX///VTN
ARX
AADACL2
TRPA1
DIXDC1
MMP28
NHLRC3
CELF2
S100A10
OGN
PEX5L
LOC100134445
PHC2
TMEM255A
TAF15
LIMA1
HSD17B6
S100PBP
LOC100506718///FLRT2
CYP39A1
KLF2
DISP1
ANKRD29
MCOLN3
LINC01279
WNT2B
TPP1
CHGB
IDNK
SLC30A4
CLEC4M
MGC24103
FGF1
SYT4
SNCA
VAPA
ASTN1
MAF
PCOLCE2
SNX29P2
AOX1
CCAR1
NELL2
COL3A1
RUNX1T1
AQP9
NEGR1
SNCAIP
MRGPRF
AQP1
MEOX2
STX2
FRY
ECHDC2
ARHGEF10
PLPP1
PCDH9
DTWD1
PITPNC1
IFFO1
CMAHP
FAM134B
DDR2
GATA5
DOCK5
MST1
PTGIS
NSD1
C21orf62
GNG11
KIDINS220
LOC646762
TSPYL1
CHD9
CDC14A
PTGER3
ZDHHC8P1
RAF1
DNAJC7
IGFBP6
HBA2///HBA1
SRSF4
KCNT2
FGFR1OP2
MGEA5
HIVEP3
LOC101926921///DAB2
TMEM37
RTN1
MIR4454///ABHD12B
CFI
MAN1C1
RAB8B
ARHGAP44
FLNC
HELQ
EIF4B
DPP10-AS1
DDX42
TBRG1
RUFY3
PDE8B
NUP58
ZFYVE16
FABP4
CYP39A1
PSMA3
CCND2
TTBK2
RNF128
TBC1D2B
CPE
KCNB1
CUX1
THBD
LHX2
OSR1
B3GALT2
BCO2
PABPC5
BICDL1
ADAMTS9-AS2
ZNF451
LXN
DOCK5
SERPINB6
HAS1
CNRIP1
SPTAN1
CRYZL1
LOC100506282
TRAPPC10
NBEA
MALAT1
SLC46A3
HSD17B2
PIP5K1B
LOC401261
SSTR1
LSAMP
ZFYVE1
SRGAP2C///SRGAP2B///SRGAP2
ARMCX4
NAV3
WSB1
BMP4
LOC100130232
LOC105371352
THBD
CAV1
UFSP2
EZR
SBSPON
PRDM5
C10orf54
SBSPON
WNT2B
CELF2
HOXC6
ZNF641
ANAPC4
GAS1RR
ATRNL1
CYS1
SBF2
PRSS35
ATG2B
PDE5A
PARVA
ARHGAP18
BDH2
EWSR1
TRIM68
GATA4
JMJD1C
XPO1
ME1
LIN7A
FGF13
FBXO7
VTI1B
LRRFIP1
ARHGAP28
MGP
INTS6L
KLF3-AS1
CSGALNACT1
SFRP1
ARHGAP44
DLEU2
PAXBP1
ADAMTS9-AS1
FER
PAPSS2
PTPN13
SP3
COL4A6
EP300
FAM69A
IFNAR1
FHL1
AKAP10
LOC101930363///LOC101928349///LOC100507387///FAM153C///FAM153A///FAM153B
LIX1L
FCF1
PCDH9
SYNE1
SNORA28///EIF5
C8orf88
GLS
CBR4
MUM1
GIPC2
CRLS1
DTNA
PRICKLE2
ZNF211
PDZD2
PPM1K
STXBP3
TTLL5
IRAK3
SFRP1
KANSL1
DST
ZNF671
SLC9A9
MYZAP
P2RX7
RGS4
RECK
N4BP2L2
MAF
MAGI2-AS3
PAPSS2
SPTAN1
PTGER3
AKAP10
EMB
MAPRE2
CCDC28A
DOK6
TSC1
ERN1
FERMT2
VGLL3
CCDC69
SEMA5A
NPIPA5///NPIPB5///LOC613037///NPIPB4///NPIPB3
LOC102724250///LOC101930059///NBPF15///NBPF11///NBPF1
SPTAN1
TACC1
LIMA1
TMEM59
STRADB
ATP10D
PLCL2
ABCA5
CDC14B
TMEM98
BNC1
CHRDL1
SEMA5A
SEL1L2
TEF
CLMP
FECH
EFNB3
BICC1
DOCK11
SNCA
POLI
PIP4K2B
GLS
LGALS8
MPDZ
ULK2
ANTXR2
SFRP1
SLC44A1
FBXO22
CYP2U1
PPM1K
LOC102725213///LOC100507387///FAM153A///FAM153B
ATG14
TXNDC15
GAS1RR
LOC100507387///FAM153A///FAM153B
C20orf194
TMEM8B
THAP6
DOCK5
SCAF4
GTF2A2
KCNJ8
TCP11L2
CCDC80
LOC114224
RERG
TMEM245
ZMYM2
LOC100133039
ZNF160
RBFOX2
ILDR2
PPP3CB
ALG13
LY75-CD302///CD302///LY75
ULK2
SNRPA1
QKI
SLC31A2
ALDH1A2
OFD1
PLEKHH2
ZCCHC24
MALAT1
LINC01140
RBPMS
ZNF224
RPS27
CAST
N4BP2L2
WDR19
SLC9A3R1
WNK4
MST1
HBG2///HBG1
RPL23AP32
BDH2
ARMCX5-GPRASP2///GPRASP2
TNRC6B
PRKAA1
SEMA6A
IP6K2
GABRG1
LIPA
REV3L
L3MBTL3
LSAMP
TMEM151A
FCMR
PDE7B
IGSF9
RUNX1T1
TJP2
JADE2
TFPI
RYR2
BNC2
ULK2
CNOT7
LOC100996412
PDE1A
CMYA5
PIP4K2A
SYNC
RAB30
SERTM1
PTPN21
CCND2
PEX5L
CELF2
LRP2
STK4
CNTN4
P4HB
LINC01616
TPP1
GPM6A
PPP1R12B
FAXDC2
CCDC80
MTUS1
SNRNP200
AQP1
DDR2
CLEC4M
WWC2///CLDN22
DSC3
ZCCHC24
TMEM161B
MIR29C///MIR29B2
FAM134B
PLCE1
NEDD4L
PLA2G2A
CTTN
DCAF8
SGCG
NPHP3
EFEMP1
GALK2
NDNF
SDPR
LRCH3
ANXA9
TMEM43
BNC2
CAND1
MTMR10
TOR1AIP2
TRIM23
SORBS2
KIF13A
CBX3
SVEP1
ABI3BP
TSHZ3
GNG11
KCNA4
SH3RF2
SCARB2
ZYG11B
DSE
PPP2R5C
NR2F1-AS1
PTRF
LOC102724562///MST1L///MST1P2///MST1
ABI3BP
NUDT12
EMP3
GPR137B
ARMC9
AFG3L1P
PTGER3
VIM
GALC
SPRY4-IT1
EZH1
INTU
TXNIP
SNX1
ALAD
B2M
U2AF1
IL15
H6PD
PDCD5
NPR2
PTPRZ1
SMAD9
DNAJC7
HSPA12A
RUFY2
KRR1
PCNX1
PLCL2
PEG3-AS1
CAMK2D
KCNB1
FECH
PTPN2
EFHC1
LINS1
COX20
NR2F2///NR2F1
TPM1
SERPINB9
NBEA
LGALS8
PIK3C3
CFD
MEGF6
RAB11FIP3
METTL7A
LOC728392
TMEM220
AP1S2
HIVEP3
LAMB1
CA11
MTUS1
ANKHD1-EIF4EBP3///ANKHD1
MEG3
LOC101060363///PPIA
PCNX1
RUNX1T1
GALNT9
LOC101926921///DAB2
CD28
TMEM176A
RAB7B
ZFAND6
ITPR2
PBX3
ATXN1
ARHGEF26
SORBS2
BBIP1
FOXN3
RBPMS
MKLN1
SCTR
ARMC8
SEMA6D
BAMBI
GOPC
SERP2
CMAHP
PPWD1
HHIP
GPM6A
CASP4
SLC2A5
FBXO9
TUB
TRA2A
HLF
ZMYM2
SH3GLB1
CRIM1
HEG1
ZNF24
AGA
XRCC5
TACC1
FOXO3
PPP2R2A
HEG1
LATS2
SBSPON
THBD
DSCAML1
TMED10
LOC145474
WASF3
HLF
NAP1L2
LOC101927752
FTO
AMZ2P1
CYSTM1
SMTNL2
ZNF226
DMXL1
FBXO16///ZNF395
GATM
CASP1
PDLIM5
STX11
RAB27B
BACH2
ELMSAN1
DSC3
PHYKPL
GIT2
ABHD2
MTUS1
XPNPEP3
CGN
ALDH3A2
P4HA2
ID3
FGFR1OP2
STRAP
MON2
SF1
PITPNC1
SLC39A8
USP47
FAM155A
PCDH17
CAB39L
IREB2
LGALS8
SRSF3
TTC37
FBXO16///ZNF395
NFIA
TPBG
MYO5B
LOC728061
DLEU2
LINC00294
ANKRD29
PIEZO2
PTPRE
TMX4
TEP1
ME1
CPEB1
CAPRIN2
STIM2
ZMAT3
ZNF641
PARM1
PTCD3
AKT3
NTNG1
OGT
RBMS3
HYMAI
ADAMTS3
MIR1182///FAM89A
CTNNA1
ACSL1
MYZAP///GCOM1///POLR2M
SASH1
PRKD3
SPTBN1
CSNK1A1
MYO9A
TCEAL3
ITFG1
SLC25A37
GATA6-AS1
PCSK5
CORO2B
ZNF654
CACNB3
CALD1
PNISR
TSPAN4
LRRC37A2
DPP10
GABPB1-AS1
NUDT7
COL14A1
SON
CNKSR2
TERF2IP
LATS2
ZBTB8A
FEZ2
PDPN
MSANTD2
LOC102725426///MIR8071-2///MIR8071-1///IGHM///IGHG1
RNASE4
TPD52L1
CYP2B7P///CYP2B6
CTNNAL1
MDM4
SEMA5A
CACNB2
TIMP1
PRKRA
SON
CRLS1
NSMAF
COLCA1
FLRT3
GNAS
CUX1
OPHN1
ARHGAP20
WWC2///CLDN22
TPP1
TMEM200B
FOXP1
FTX
RPAIN
ECM2
UGP2
IFFO1
PHACTR2
FAM13C
PHF21A
TAF1C
ZFPM2
DCLK1
TTC13
LCAT
PTPRO
EPHB6
RUFY3
AP5M1
RBFOX2
ERMARD
PMP22
YPEL4
NR3C2
DPYS
WDFY3
MIR4800///MXD4
NAP1L3
SYNPO2
MCC
NRXN3
SIPA1L1
TPM1
SEMA3C
SNAP23
SPATA7
LYVE1
GNG2
TOR1AIP2
SLC41A2
HHIP
TXNIP
TNRC6A
SCARB2
ABCA9
ADH1B
FOXN3
GUSB
EIF3B
ESD
KLHDC8A
LAMTOR3
PPP1R3B
GLA
DCN
OMD
ANGPTL1
DCP2
ZNF662
FRY
ZBTB20
CFLAR
TAF9B
TBC1D2B
FBXL20
ATP7B
GRAMD3
C11orf95
C1RL
PDE8B
PARD3B
TNRC6A
PEG3
CCDC68
SCARA5
CREBL2
PPWD1
ANO5
CRYZL1
C10orf76
FAM69A
MCOLN3
LOC100996760
NR2C2
SCAF4
CDC40
SIK3
RIC1
ARHGAP21
HPCAL1
PDLIM5
HDDC2
PARVA
ARMCX1
MAGI2-AS3
HSD17B11
KIZ
MUM1
NDFIP1
TMBIM4
BBS4
ASB8
ERC2
BBS9
FHL1
DSC3
RTN1
LAMA4
GNG12
IL6ST
TMOD2
WWP2
PAPLN
MLXIP
GTF3A
HDHD2
BTRC
MAFK
DKFZP586I1420
GAS1
FTX
PDZD2
CALD1
ZFYVE16
EZR
IL18
SECISBP2
TPBG
MAPRE2
BNC2
PLA2G12A
NXF1
B3GALT2
MARCO
PTGFRN
TNFSF14
STAG1
RAPGEF6
SYTL3
VPS13C
ALS2
AKAP13
C2orf40
EFEMP1
SLC35E2B///SLC35E2
DCBLD2
ZNF540
NR0B1
ATG12
MTUS1
SRSF6
CLIP3
PLXDC2
CIRBP
MYO1D
STX7
U2SURP
SNURF///SNRPN
MYRF
MEG3
MBNL3
HSPB11
KCNT2
LTBP4
CLK1
ATXN10
PARVA
UPK3B
CFL2
CANX
PRKACB
RSRP1
CCNI
C1orf168
PAPPA
RAPGEF2
HOXD10
CDS2
SLC25A27
HNRNPC
MGP
CCDC90B
ZSCAN18
LOC100507577///LONP2
METTL25
SOX6
FOXN3
TNPO1
TRIM6
TFPI2
KIAA0430
FBXO11
LRRN4CL
PCNP
CAV1
AQR
LPAR5
TMEM136
BNIP2
FAM160A2
PDS5B
ZFYVE26
BLOC1S6
WSB1
ZNF397
NSUN6
OGT
SVEP1
SERPING1
MEGF9
SYNRG
AQR
TFPI
CLDN11
MAOA
NUB1
NPHP3
ZNF207
SON
MAP2K5
DDX17
FOXP2
DDX50
CRYL1
ARNTL
CHD2
PIGH
NANOG
NKTR
LOC727820
UBE2D3
N4BP2L2
LYVE1
LRFN5
COL6A6
C4B_2///C4B///C4A
SBF2
METTL14
GLI3
MBD1
SORBS2
LOC101927330
C7orf31
TAGAP
PIEZO2
DOCK5
TMBIM4
ERO1B
KAT2B
SPAG9
ZBTB20
NEDD4L
WNT5A
FYCO1
AFF1
LINC00597
TMEM64
GLIPR1
PCBP2
ANG
SYNE2
TMBIM4
SHE
TMEM109
ZBTB20
FRAS1
C11orf58
LILRA2
SLC35G2
PPID
PTPN14
ZNF638-IT1///ZNF638
GALK2
SEC31A
NR3C1
CRYZL1
GRK5
STX12
DPY19L1
PATJ
FBXO16///ZNF395
ADH5
COG2
LOC100288911
CBX7
GIPC2
PDLIM3
PLCG2
SASH1
SLIT2
OSTM1
DCN
MUM1
DLGAP1
MPHOSPH8
CHN2
SF1
C1orf101
DPP8
CFAP221
PCDH17
SUZ12P1
RBSN
SNX33
C2orf42
MIR4746///UBXN6
PELI1
CREBRF
SNHG18
CNBP
CDH11
SAT2
ANKHD1
UTP6
CNST
GNG12
SEMA6D
IKBKAP
HSDL2
LMBRD1
PLXDC2
PRPS1
GSTA4
EZR
DYNC1LI2
BASP1
FCN1
TMED5
TEFM
BBS2
RNF13
NISCH
DIS3L2
SOBP
SMAD5
RNASEL
ATP8B2
LRRC37A2
DGKH
LOC101930306///RRN3P1///RRN3P2///RRN3
FKBP11
FKBP11
CADPS2
PEAK1
ZC3H4
DPP6
PROSC
TFE3
LOC101927705///P4HA2
DMXL2
ABI2
RASSF3
AKAP13
VSIG4
CST3
SEC31A
CROCCP2
RUNX1T1
SMOC2
PLCE1
POLK
CSNK1A1
NDN
KATNAL1
LOC101929500///CRIM1
TBRG1
ZMAT3
TBC1D5
STK31
MAOA
PIK3C2A
CFAP221
DHRS7
PCDH17
PXK
PCSK5
SPG11
ELP2
DYNC2H1
NECAP2
BNIP3L
FYN
MON2
FAM13A-AS1
ZNF37BP
PDGFRA
TTC3P1///TTC3
MPDZ
MPHOSPH8
LAMA4
RAPGEF2
SLC23A2
SEMA6A
PDE1A
TRMT13
GFRA1
RBMS1
TAF9B
FNTB
PSAP
CNIH1
PIK3CD
METTL14
MDN1
ALOX15
ABHD17A
CMTM3
GOSR2
SESN1
SOX6
RAP1GDS1
SLC6A16
ZNF559-ZNF177///ZNF177
TMEM245
NDUFS4
TCEAL1
CPED1
OGFOD1
XPA
SYNJ1
CTIF
MACF1
MIR99AHG
KLHDC1
RERG
ARNTL
TMED10
TOR1AIP1
STAMBPL1
NEO1
TBC1D15
ITM2B
AFF3
PNPLA4
PRRX1
SYNPO2
RRAS
TRPC1
EIF1
PIK3R1
TPM1
EBLN2
IL6ST
SNX21
2022-09-02
ITSN1
FOXO3
GCNT1
CYB5D1
RBM43
KLF8
FBXL20
LOC100996693///SPEG
ARL17B///ARL17A
SEMA6D
UBR4
SMARCA2
TAF15
KIAA0485
GABARAP
TXNDC15
GSTA4
SERINC1
CFAP221
ATP6V1D
GABPB1-AS1
RNPC3
STIM2
MBNL1
CCDC84
RBMS3
ATP5C1
SLC25A27
UBE2I
GPR75-ASB3///ASB3
TNPO1
ATP9B
SH3BP5
NDUFB6
DNAJB14
CRTAP
PARP8
SRGAP2
CTAGE5
CCND2
TIMP2
PAPSS1
STAG3L2///STAG3L3///TRIM73
SNTB2
TSPYL1
DIS3
UBE2B
CCDC53
IST1
ERVK13-1
NDFIP2
KIAA1109
SNX3
MEF2C
SLIT3
OMD
FAM213A
CTNNB1
SLC38A9
SP100
ALDH1A3
EOGT
WT1
NR2F1-AS1
DDX52
CELF2
ZNF395
NPL
AKR1C1
BCL2
WDR1
C20orf194
FPGT
MSI2
RASA1
MSRB2
PLSCR4
SNORD50B///SNORD50A
ATL1
WDR41
TPM1
ZBED5
CNOT1
MAN2A1
KLF9
ANO4
ANXA5
LOC101929500///CRIM1
DNAJB9
KIAA1958
SLC7A7
CHP1
PKD1L2
PIK3C3
RARRES1
TBC1D9
MBNL3
SNX13
KCTD7///RABGEF1
PSMD6-AS2
PIAS1
TBC1D8B
ANOS1
ING3
PAN2
RTN4
LRRFIP1
ANKRD10-IT1
MFSD1
USO1
MAST4
ASPA
NFIC
HIVEP3
CCDC50
EPB41L3
VAMP3
ZNF493
MN1
TRIM13
CDC14B
TRAF5
ARRDC4
RGPD6///RGPD8///RGPD3///RGPD4///RGPD5
ANKMY2
DENND4A
ARID2
VGLL3
MMP24
ITSN1
HPSE
GAS7
HPS5
STX17
HEXB
SOX6
SLC25A37
TTC3P1///TTC3
RASSF3
SEC22C
USP13
SLIT2
SUPT20H
KLF11
NKTR
GCOM1///POLR2M
RPL36A
ANKRD13A
FBP1
CRTAP
RALGAPA1///RALGAPA1P1
TBC1D5
SYTL4
GCOM1///POLR2M
CNIH3
BBIP1
SFPQ
TMEM9B
CDC14B
HECTD1
ZNF230
HBG2///HBG1
ECHDC2
GART
NHSL1
STIM2
CREB3L2
CASP1
TGFBR2
DSTYK
AGA
CFI
ROBO3
UBE4A
TMX4
MZF1
ATP6V1B2
2022-03-08
DSTYK
DMD
CDC14B
SNCA
SDCBP2-AS1
ATP7A
RBM39
KIAA0226L
PROS1
USP13
FAM126A
CIRBP
ANAPC4
COMMD1
ARHGAP25
DENND5B
ZNF302
FAT4
UGP2
SUPT20H
PRKD1
DENND5A
CREBL2
EPB41L3
ITM2A
ZRANB1
HBG2///HBG1
FAM208A
OIP5-AS1
SYT1
SETDB2
RGL1
IFT20
FXYD1
CLK4
HEBP1
CNEP1R1
HELQ
ZNF12
FAM120B
FOXP1
PRKCDBP
TACC1
RABEP1
TP73-AS1
MUS81
CDC42EP2
PGM5
EPG5
EPB41L3
CYB5D1
RAC2
AGFG1
MAPKAP1
CTR9
SNX3
RBPMS
TTC8
SLIT2
RAPH1
ADAMTS9-AS2
RUFY2
SPG20
COLEC12
SCG5
VPS13D
NAPEPLD
PPP6C
DCAF5
GOLM1
JAM3
CASC4
DYNC1LI2
LOC101930583///GOLGA8B///GOLGA8A
CRIPT
SAR1B
AES
N4BP2L2
CASP1
WDR7
TNPO1
ETFDH
TDRD3
RBBP4
SRSF7
RAB31
PPP6C
TIAL1
EFNA5
SECISBP2
ZEB1
CMYA5
ZBTB47
PSMD11
DCLK1
RALGAPA2
MRPS14
MYO9A
HBD
HNRNPD
RGS18
ZNF658
CHD9
WNT5A
NFKBIZ
ENKD1
RBM6
PLGLB1///PLGLB2
EGFR
DCN
NSUN6
ILK
NBPF1
CLIP4
DPP8
KANK2
RALGAPA1
TGFBR1
ENOX1
ZEB2
C11orf80
CCNDBP1
IARS
CRBN
RBP4
TDRD10
LRRC2
INO80D
PRPF38B
PCCA
ZSCAN18
SRSF3
LINS1
TACC1
SSBP2
LOC100506639///ZNF131
BBS4
FCGR3B///FCGR3A
PSD3
SEL1L
SREK1
FOXP1
EHBP1
NOTCH2NL
CCDC69
CREBRF
STAMBPL1
ITSN1
IFI16
GOLGA2P5
SREK1
SYNRG
SEMA3C
MS4A4A
WIPF3
RCHY1
EVI5
RAB38
TRPM3
CAMK2D
CEP120
NFATC2IP
POLR3GL
FUS
ST13
PSMC2
RHOQ
MICAL2
FRMD6
ZFYVE26
NFE2L2
PITPNC1
HP1BP3
TTC3P1///TTC3
NPL
SMPDL3A
EPHX2
CYBB
RAB31
TCAIM
RBP7
SYNE2
ITGAM
PKHD1L1
MYOF
HEATR5A
MACF1
ZNF12
CDH11
PGM3
STRN
PCLO
KLK11
TFPI2
ARNT
CSF2RB
NTAN1
KCTD6
ST6GALNAC3
CYP19A1
CALD1
RAB2B
ELL2
CCDC93
KITLG
ATXN2
MIB1
LINC00849///SLC25A16
PRKG1
RNF146
CERK
SERPINB9
DNAJB9
NEK7
SELL
KLF4
TMEM248
SLX1B-SULT1A4///SLX1A-SULT1A3///SULT1A4///SULT1A3
MBNL2
CTNNA3
LAMA4
ISCA1
PHLDB2
NUDT6
AGPAT4
TUG1
PCDH9
ZNF471
GTF2H1
SPAG9
PPA2
BBS9
BTBD19
SLC16A4
GABPB2
FAM210B
FAS
SLITRK5
ASH1L
ZNF227
PRKAR2B
SNX3
RBMS1
RAB30
GCNT1
SLC39A8
SRSF5
LOC101928830///LTA4H
MLH1
SPOCK2
TSPAN8
PDE3B
SLC35B4
STX8
CALCRL
SUPT20H
MSL3
SCIN
ZNF274
SNORA70///RPL10
DNAJC27
ETFDH
BCOR
MSRB3
ZNF266
ASXL1
MCTP2
CD163
GNS
MAML3
LONRF2
TOR1AIP2
SLC35D2
SYNJ2BP-COX16///SYNJ2BP
C10orf54
MACF1
RAB8B
RHOA
IFNGR1
CLEC10A
SCARB1
ZSWIM7
ZEB1
ETFBKMT
MAMDC2
MTHFD1
PDLIM2
WBP1L
MCTP2
ARHGEF12
SEPP1
PAPD4
TXNIP
MPP5
PCSK5
TMEM106A
CDC42
FLRT3
SAMD4A
ACAA2
ASXL3
EID1
LOC101928747///RBMX///SNORD61
CGN
DST
PMP22
ABCB4///ABCB1
ACTB
C8orf44-SGK3///SGK3
MYO5B
PROSC
SLC40A1
MEF2C
ZNF189
CBLN2
RSPH3
KPNA5
RARRES1
TIMM10B
PP12719
GABARAPL2
VPS13B
C4BPA
LOC401220
NR2F1
LEPROT
FAM160B1
MPHOSPH6
STAR
NIN
HERPUD2
HOXA5
KIAA0922
ZNF302
GNPDA2
APBB2
ZNF277
AKAP17A
NEK9
DPYD
SHISA3
EXOC7
CFH
CCNK
BTF3
MBNL3
FAM220A
OSBPL1A
RNF103-CHMP3///CHMP3
SRSF4
PAPOLA
SLC7A8
WDR61
TRPM3
BTN3A2
GOLGA1
NFE2L1
PAWR
KATNBL1
PTGER3
CXCR2
FAM46A
RBMS1
PREPL
ZNF697
ANXA1
DCTD
OIP5-AS1
UGGT2
TMEM200A
SLC35A5
INTS10
SH3BP5
GTF2H2B
HNRNPDL
DENND1A
C1QTNF3-AMACR///AMACR
ZFYVE21
FBXO9
WDR59
PID1
2022-09-07
PSD3
PARVA
NPHP3-ACAD11///ACAD11///NPHP3
NKTR
CHD9
SYNGR1
ATF6
GLIPR1
PPM1E
USP30
POLR2J4
ZBTB20
RNH1
NRXN3
SULT1A1
CPB1
CCDC92
DDX17
NCBP3
CDC16
TLE4
TCF25
BORCS7
GABPB1-AS1
HNMT
FYN
BBX
SNX3
LOC100190986
PHKB
CFL2
LOC101930400///AKR1C2
EIF1B
DTX2P1-UPK3BP1-PMS2P11
CNTN1
EFCAB14
SETX
SUSD5
MAP4K4
ARHGEF7
TMEM43
MED17
TVP23A
AHI1
CTSO
MFF
FBXL4
ATF7IP2
ANKFY1
MYL9
EPS15
FTL
LYRM9
TMEM59
HNRNPD
LRCH3
INIP
PAPPA
RBM39
FERMT2
UVSSA
DENND4C
HNRNPA2B1
ANAPC5
REV1
NFIC
EIF1
AIF1
CYP2R1
C6orf120
FAM46A
CD36
AS3MT
GALNT1
CD14
RNF13
GALNT18
EFEMP2
ALPK1
SPATS2L
HNMT
PLA2R1
CCNL2
STX16
CBX6
FBXL7
XIST
SLC25A27
CAST
EZR
EEF1A1
PIP4K2A
ST13
DDHD1
RABGGTA
MED23
MTSS1
CDKN1C
ITGA1
COL21A1
PHACTR2
MAP3K3
GNAI1
EPG5
CD151
ZBTB20
HERPUD1
UAP1
NTAN1
DNAJC27
ZBTB20
PPP2R5E
ID1
FZD7
AASDH
IL6ST
CLEC4A
EIF1
SDPR
IPO5P1
SDHAP2///SDHAP1///LOC220729///SDHA
CNTN1
RAB33A
NFIB
HLX
PIK3C3
ANXA3
FBXO8
LPP
SREK1
PAPD4
HLF
ATXN10
POLI
RAB31
SLC12A6
KY
SELK
ANAPC5
TTC3P1///TTC3
TIMP3
RBMS3
CSNK1D
CDH11
SIK3
POGZ
SEC62
NIPAL3
DOCK4
LURAP1L
STK26
CD164
SLC25A37
RBPMS
LEPROT
PLXNB2
SRSF7
IL6ST
PIGB
GNB5
RBM5
SLFN11
CPQ
MIB1
SLC7A8
MFSD4A
ARHGEF6
KCNJ8
ZNF493
BTD
DCN
ESD
PPP3CC
TMED8
PNRC2
MICAL2
MBP
TUG1
SRGAP2C
SYNJ2BP-COX16///SYNJ2BP
SMARCA1
HNRNPH3
ITPKB
PARVA
TXLNG
IFNGR1
KLHL36
C11orf58
TAOK1
LRRC37B
[truncated: 5,544 more rows]
