# Supplementary material for: Downregulated m⁵C Regulator NSUN6 Enhances Proliferation, Migration and affects immune regulation in Ovarian Cancer
Source: Research Square preprint supplement (doi:10.21203/rs.3.rs-7313758/v1), 2025-12-08
Supplement: Supplementary file 2 [file b74aa010fa277846334c7c81.xlsx]

## Sheet: Sheet1
m5C
NOP2
NSUN2
NSUN3
NSUN4
NSUN5
NSUN6
NSUN7
TRDMT1
TET1
TET2
TET3
ALKBH1
YBX1
ALYREF
DNMT1
DNMT2
DNMT3A
DNMT3B
